# Supplementary material for: Synthesis of dihydroindeno[1,2-c]isochromene via cascade cyclization and Friedel–Crafts reaction
Source: Royal Society of Chemistry journal article supplement (doi:10.1039/c6ra22329j), 2016-01-01

## Supporting Information

### Synthesis of dihydroindeno[1,2-*c*]isochromene *via* cascade cyclization and Friedel-Crafts reaction

Anil Kumar Saikia,\* Priya Ghosh, Manash J. Deka, and Madhurjya Borah

Department of Chemistry, Indian Institute of Technology Guwahati, Assam-781039, India

#### Contents:

- |                                                                                                                              |                |
|------------------------------------------------------------------------------------------------------------------------------|----------------|
| 1. $^1\text{H}$ and $^{13}\text{C}$ NMR spectra of <b>3a-3p</b> , <b>3r</b> and $^{19}\text{F}$ NMR of <b>3g</b> , <b>3j</b> | <b>S2-S20</b>  |
| 2. X-crystallographic data of compound <b>3b</b>                                                                             | <b>S21-S22</b> |
| 3. HRMS Spectra of compounds <b>3a-3p</b> , <b>3r</b>                                                                        | <b>S23-S31</b> |

# $^1\text{H}$ NMR and $^{13}\text{C}$ NMR spectra of compound 3a

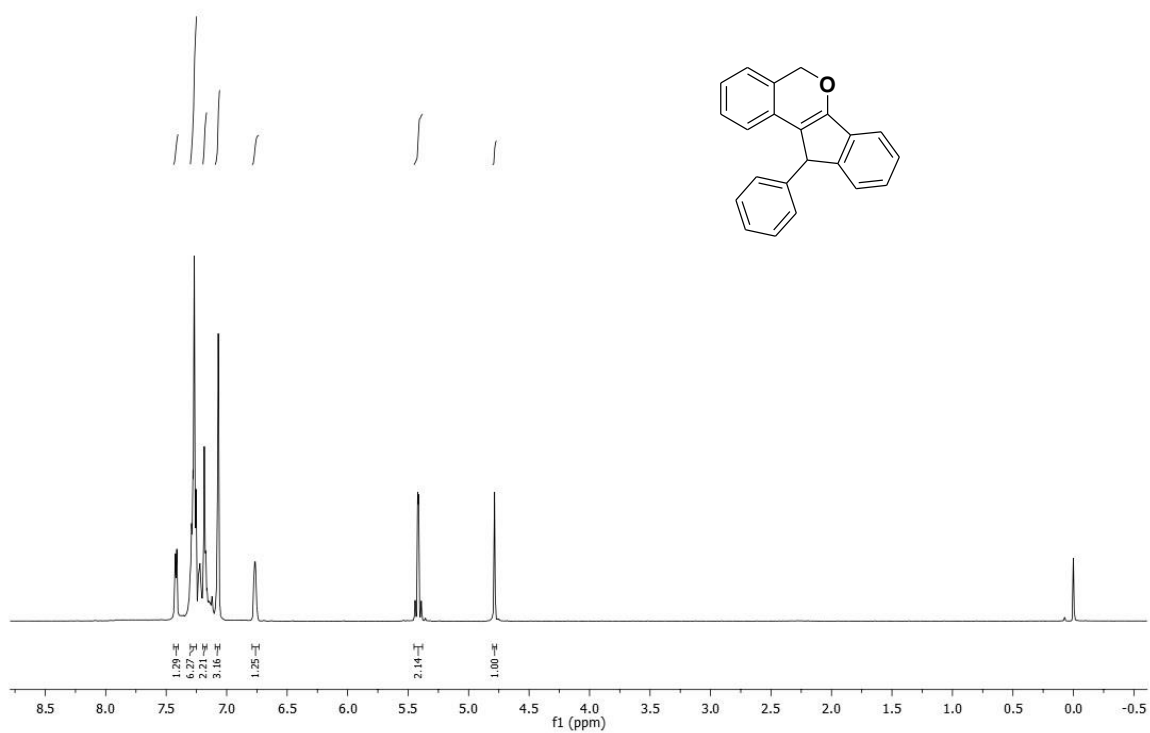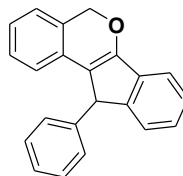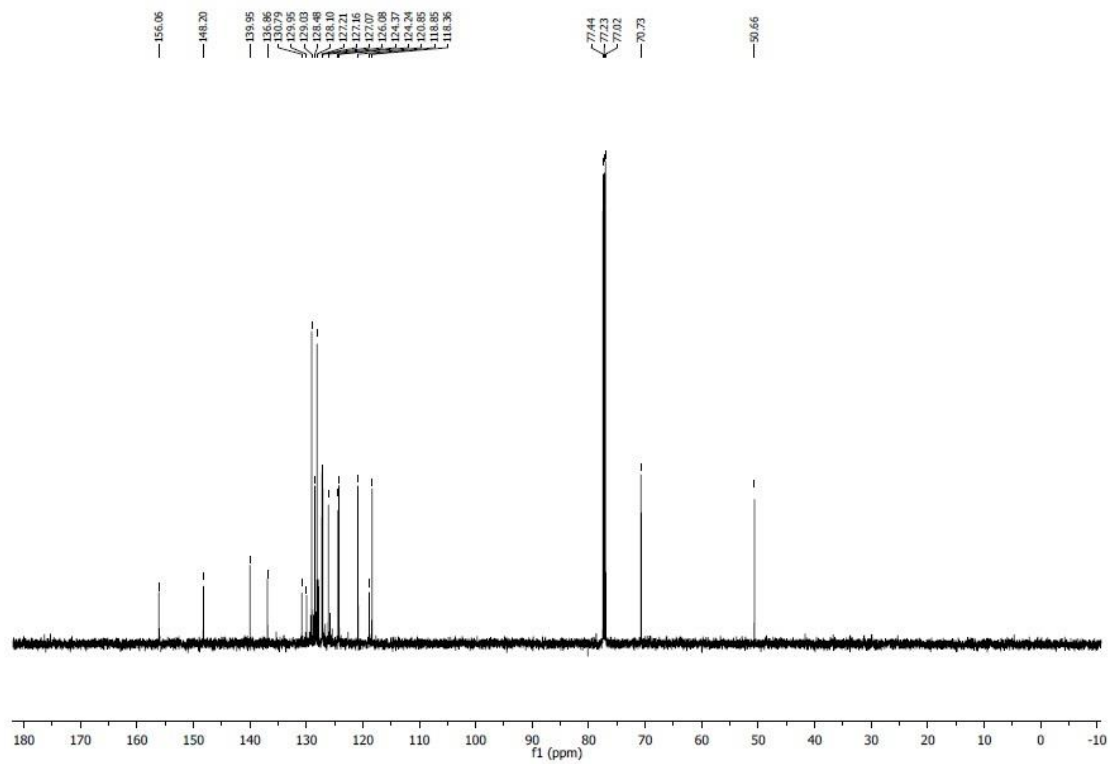

# $^1\text{H}$ NMR and $^{13}\text{C}$ NMR spectra of compound 3b

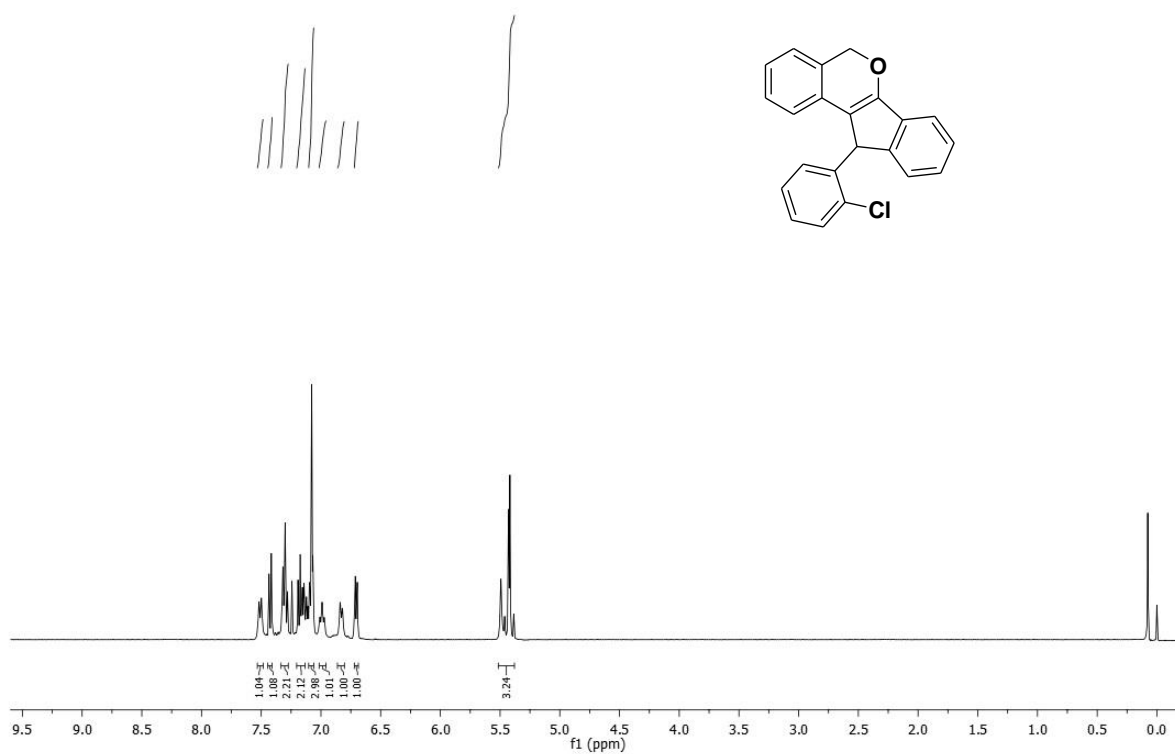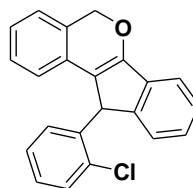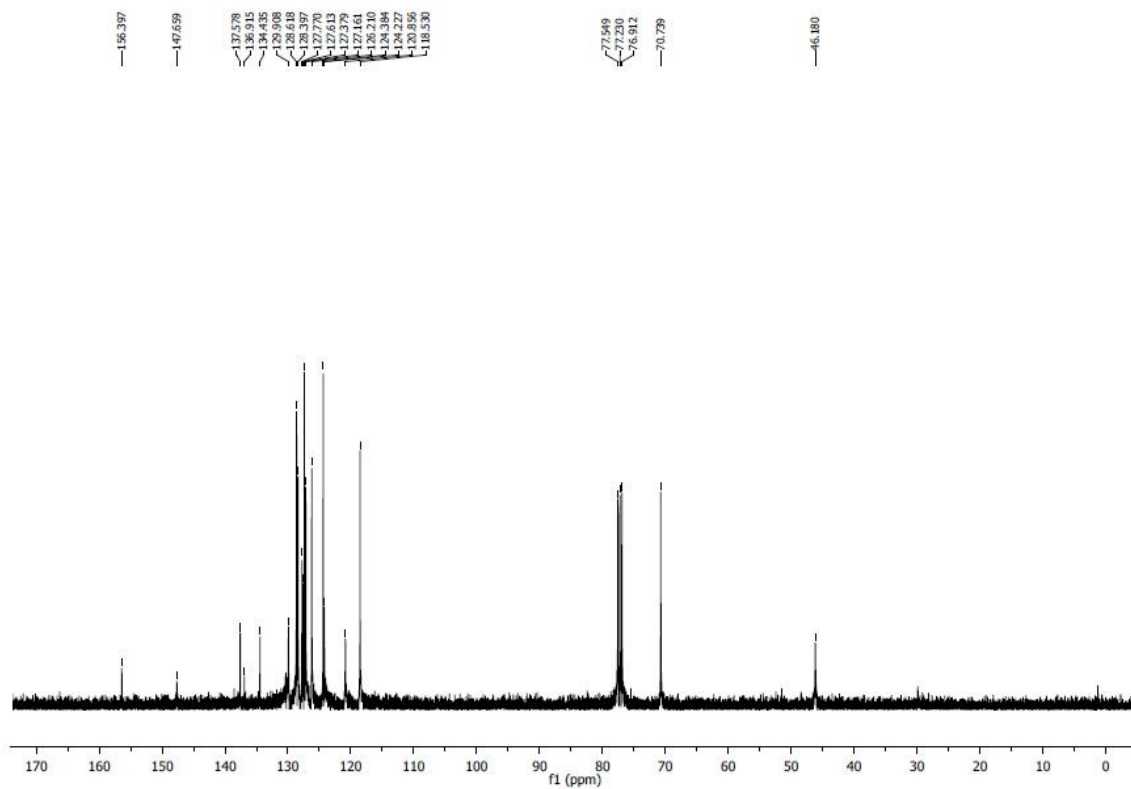

# $^1\text{H}$ NMR and $^{13}\text{C}$ NMR spectra of compound 3c

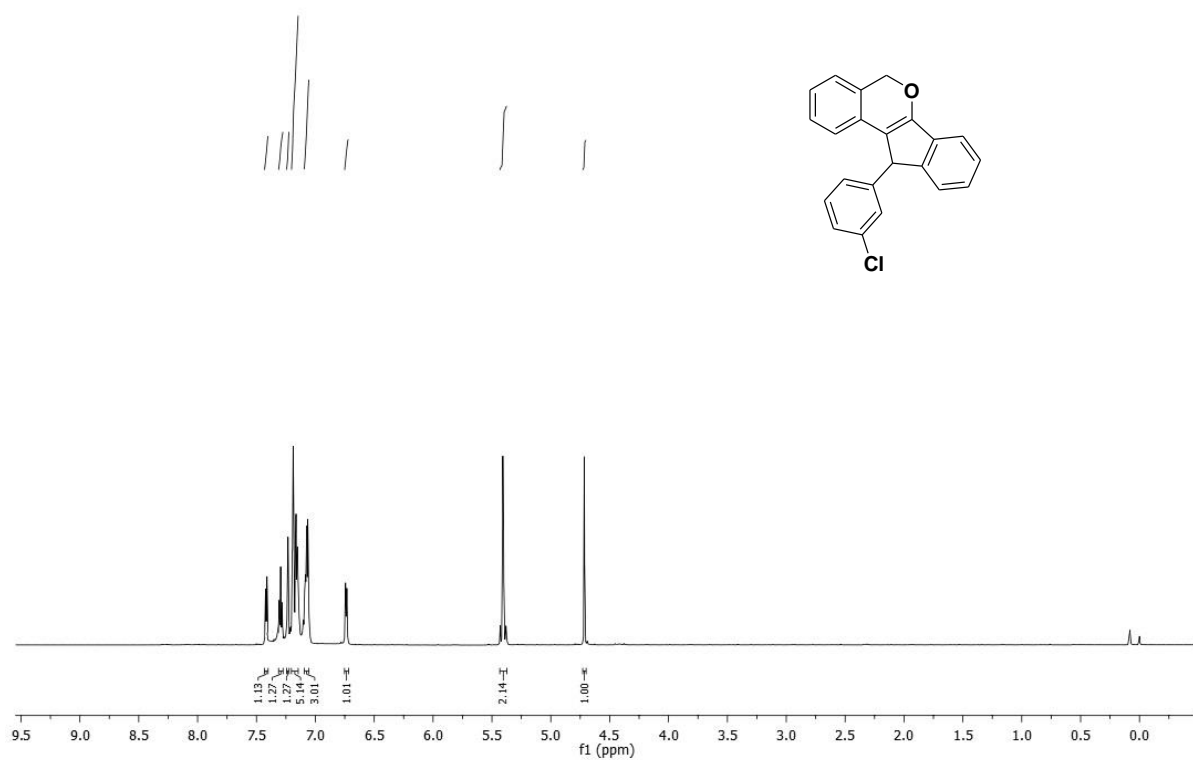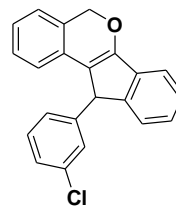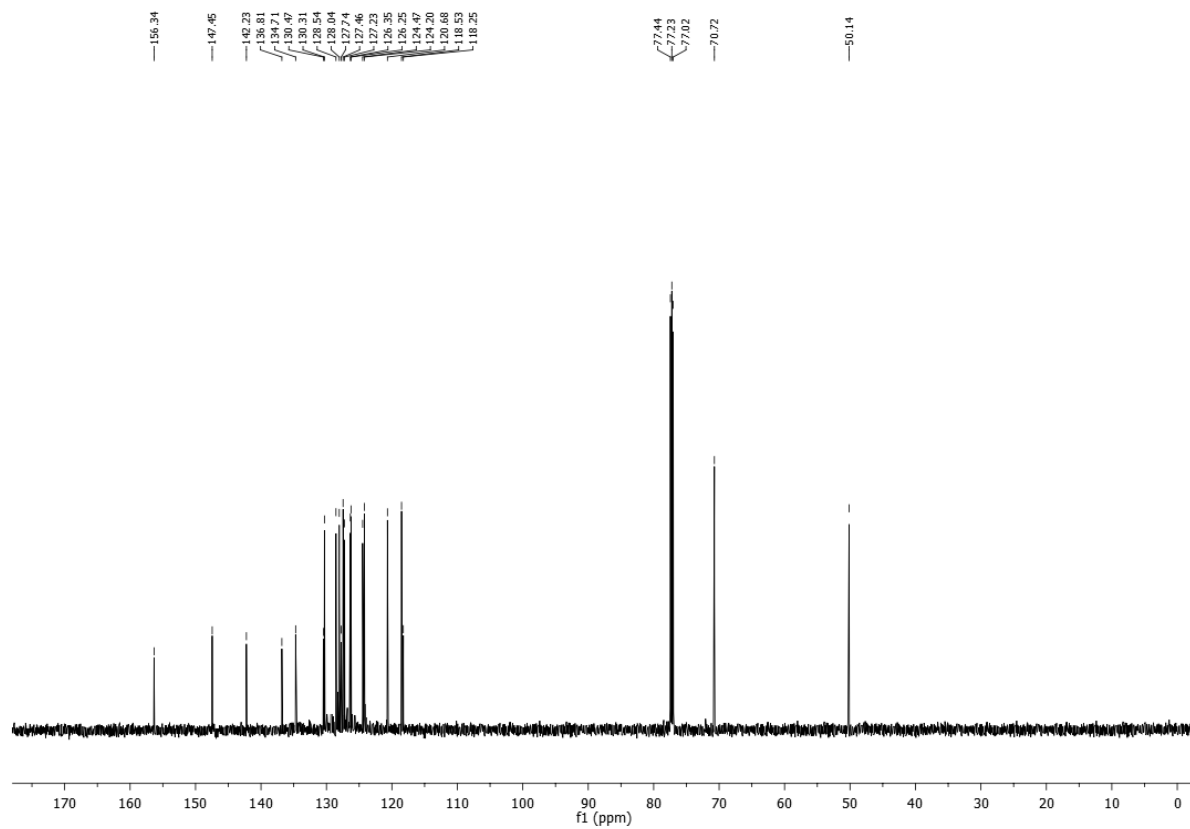

# $^1\text{H}$ NMR and $^{13}\text{C}$ NMR spectra of compound 3d

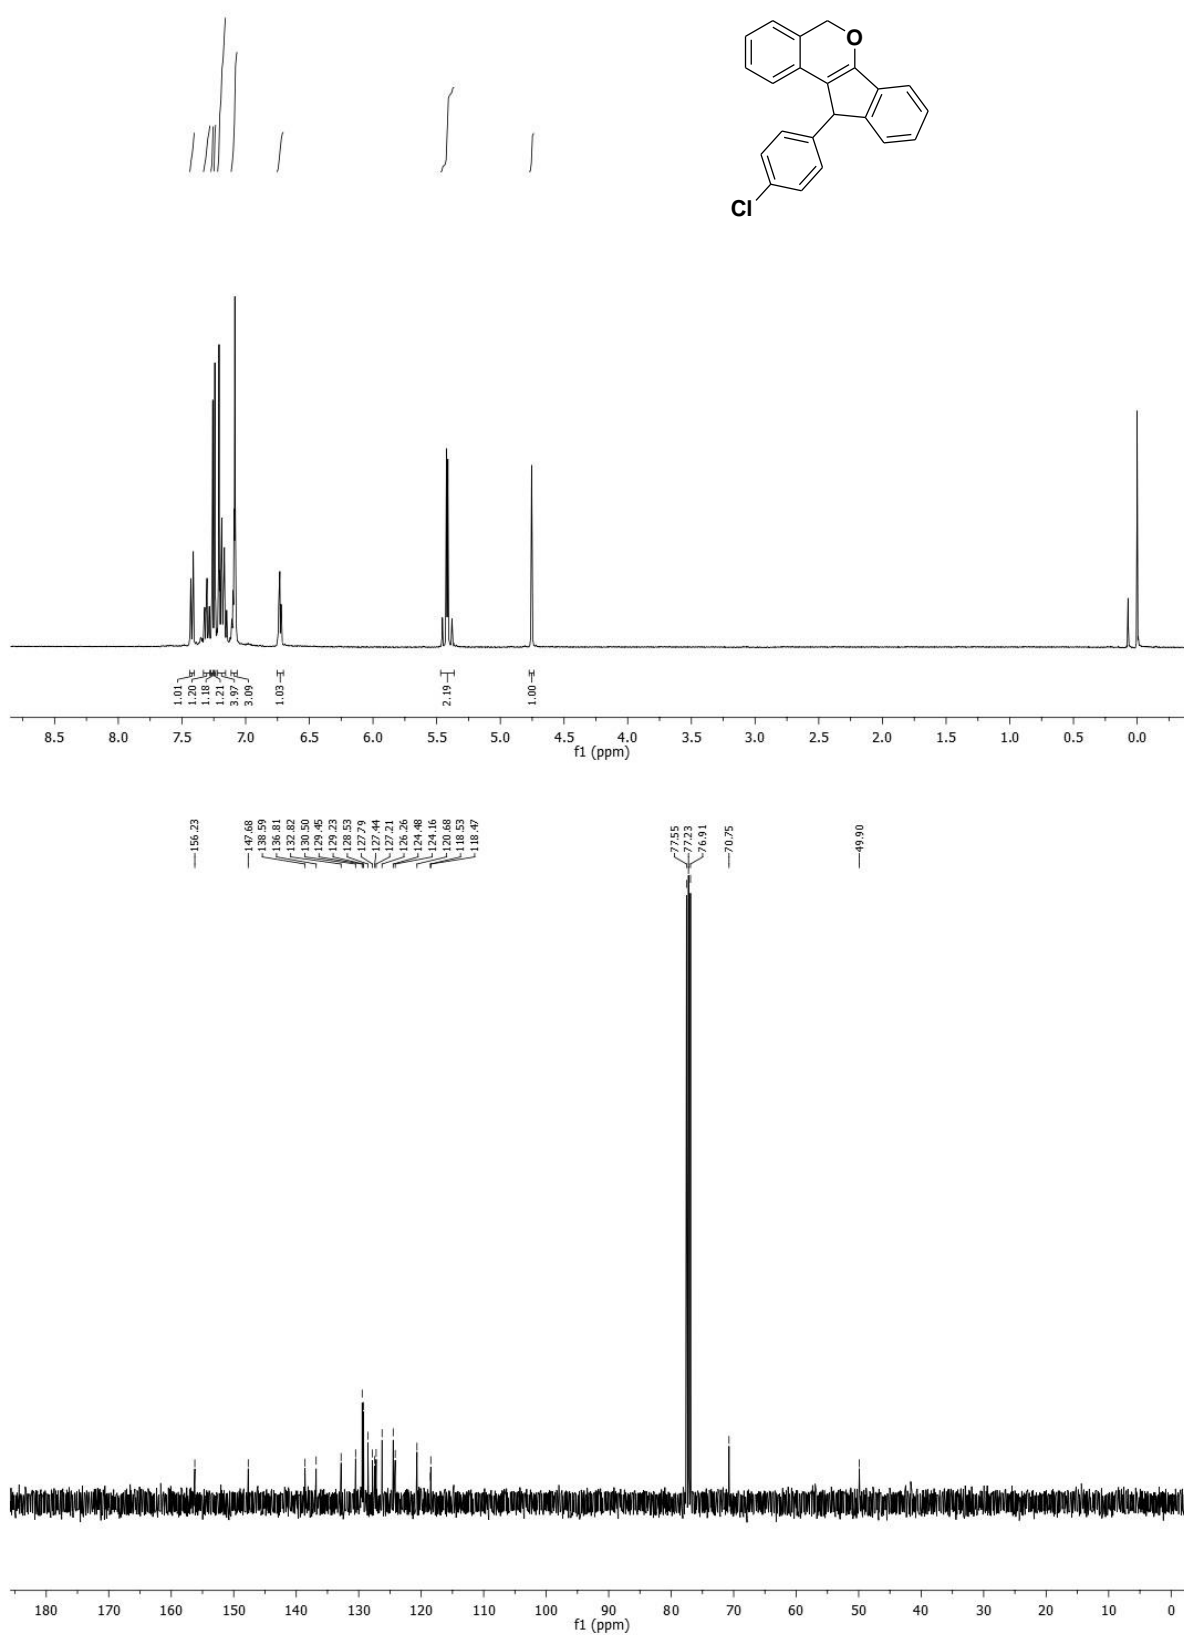

# $^1\text{H}$ NMR and $^{13}\text{C}$ NMR spectra of compound 3e

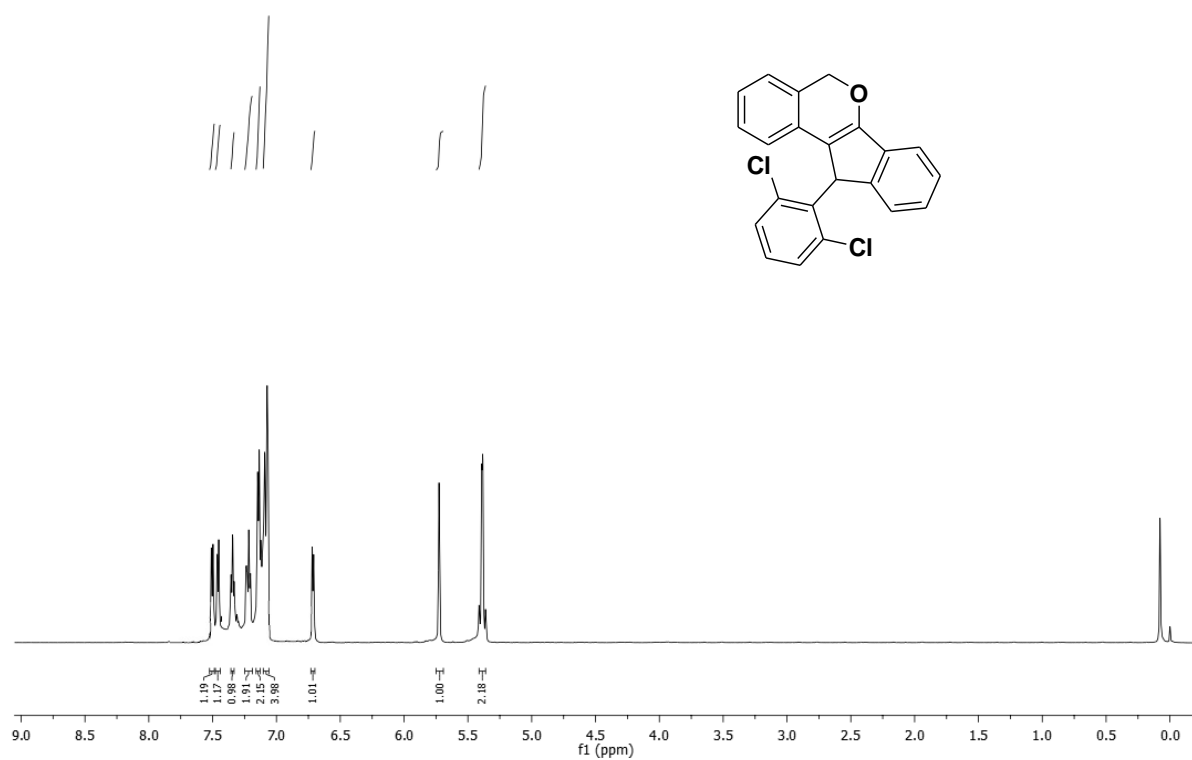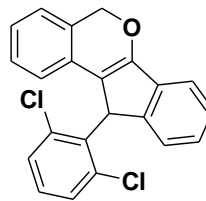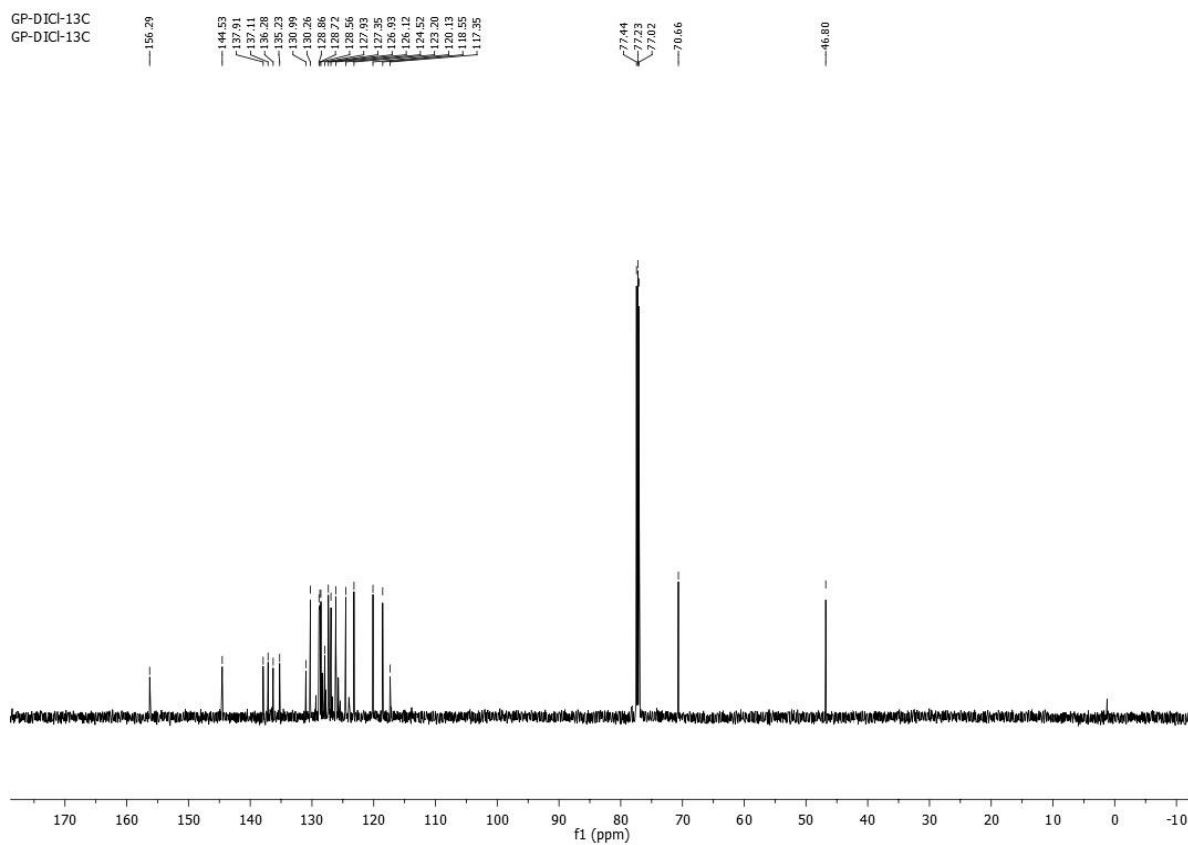

# $^1\text{H}$ NMR and $^{13}\text{C}$ NMR spectra of compound 3f

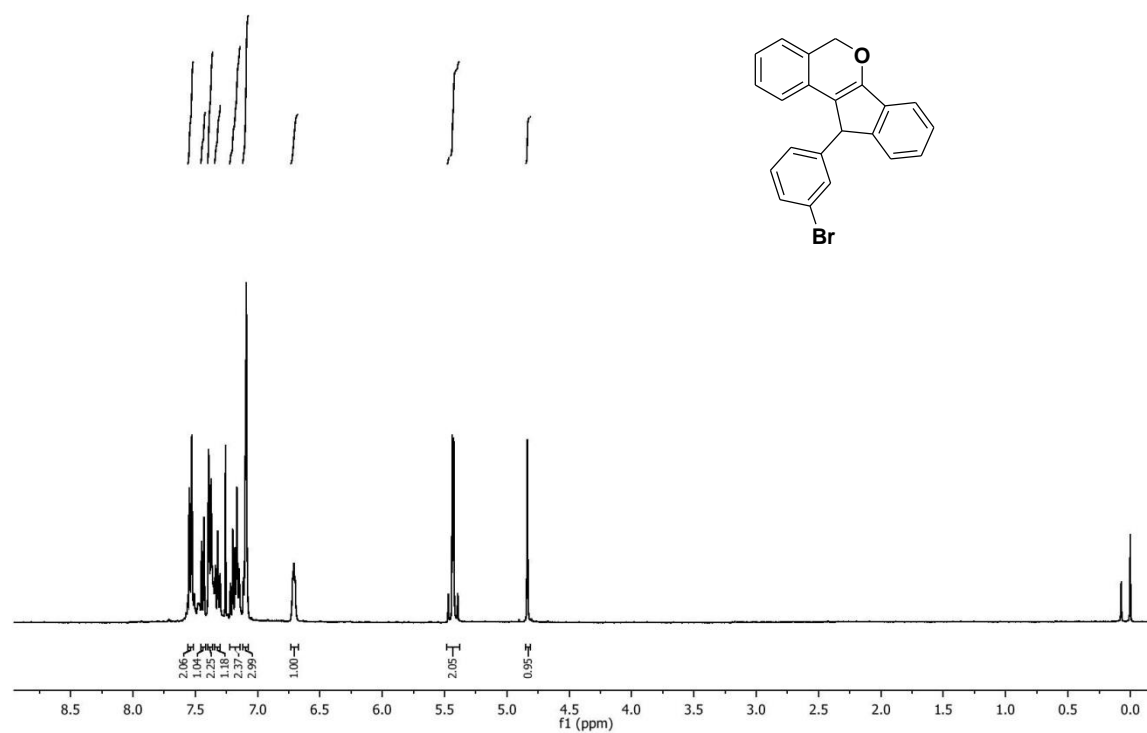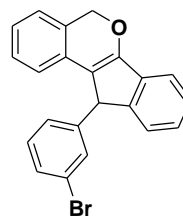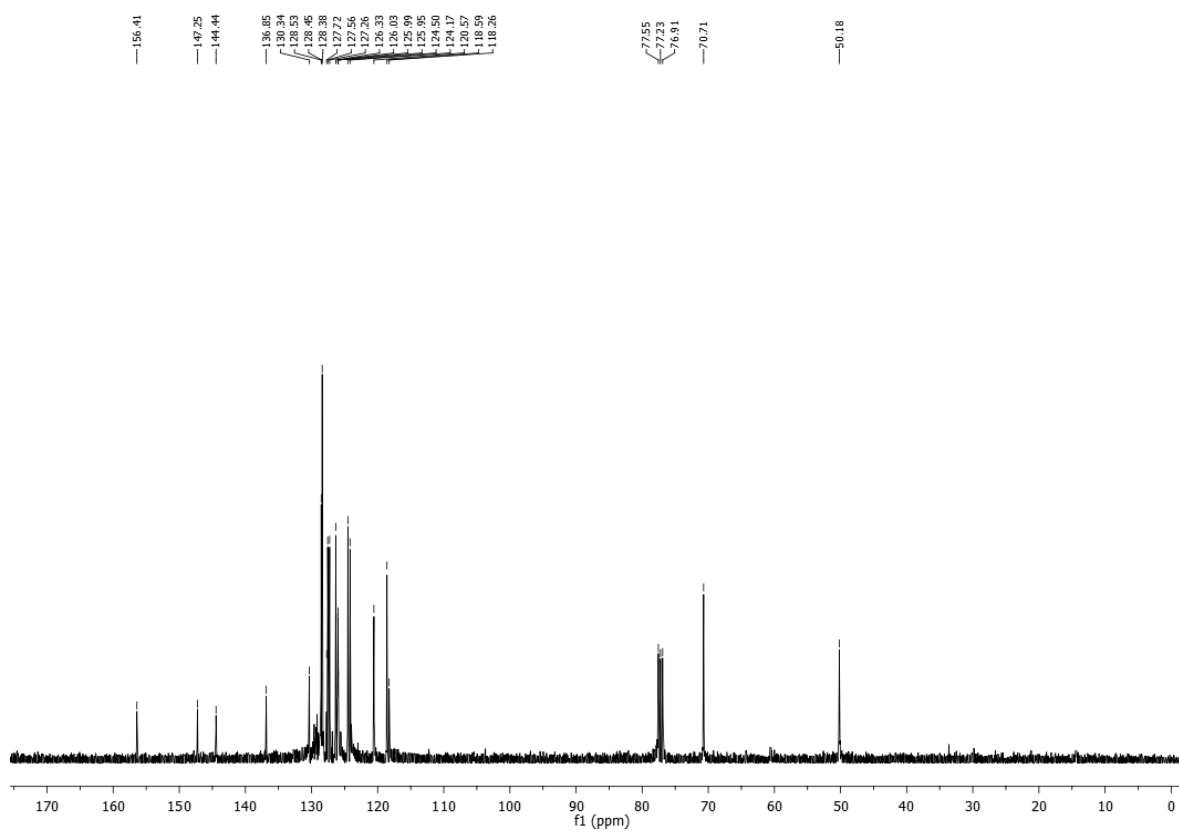

# <sup>1</sup>H NMR and <sup>13</sup>C NMR spectra of compound 3g

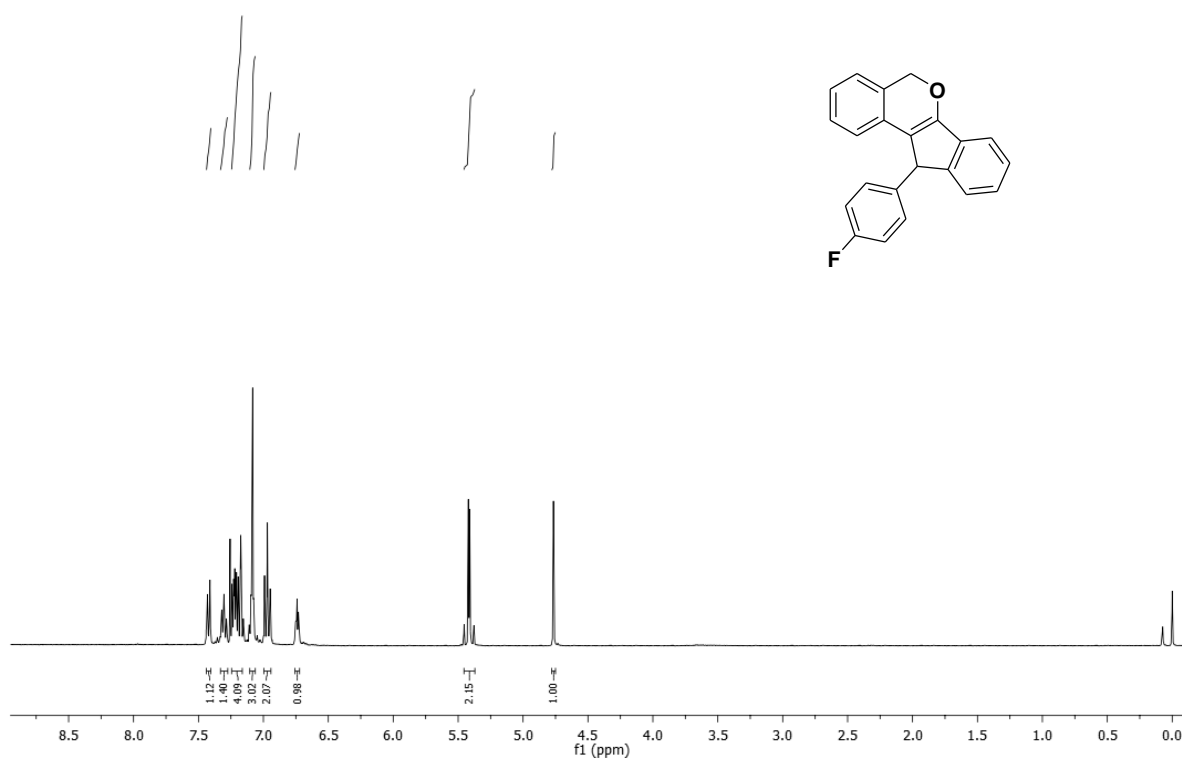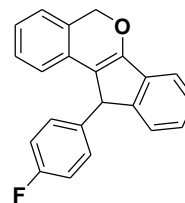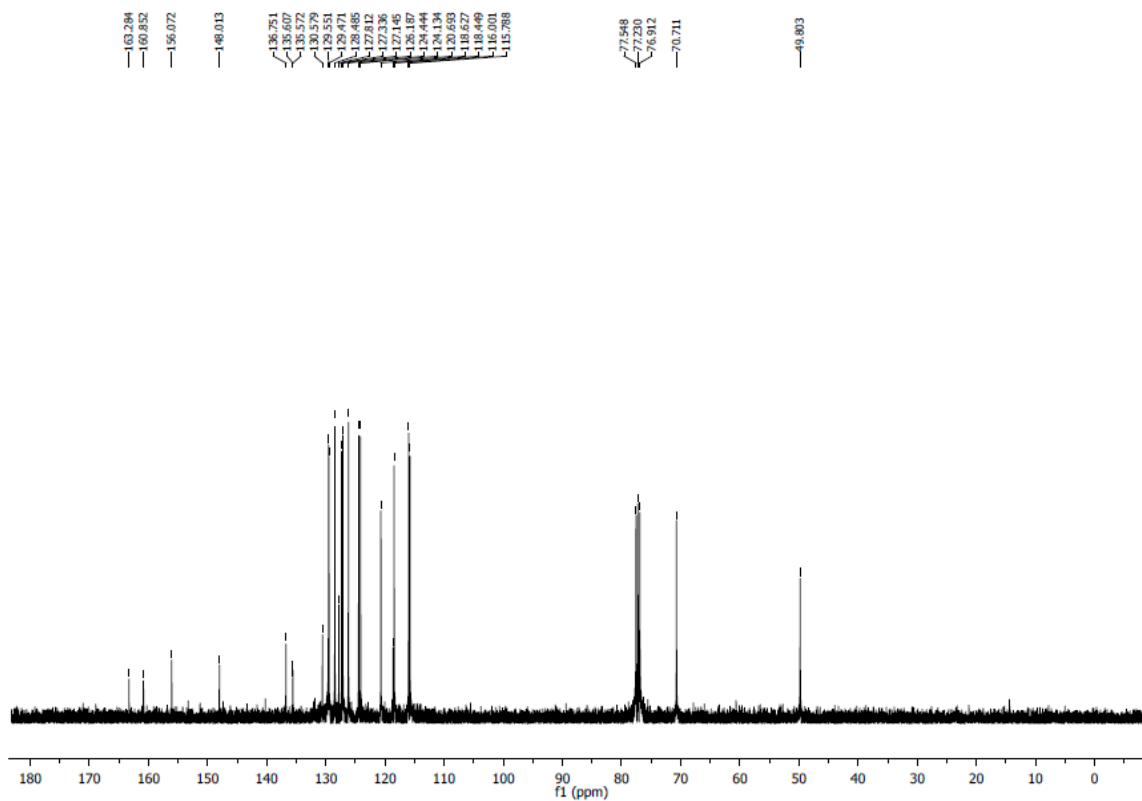



# <sup>19</sup>F NMR spectrum of compound 3g

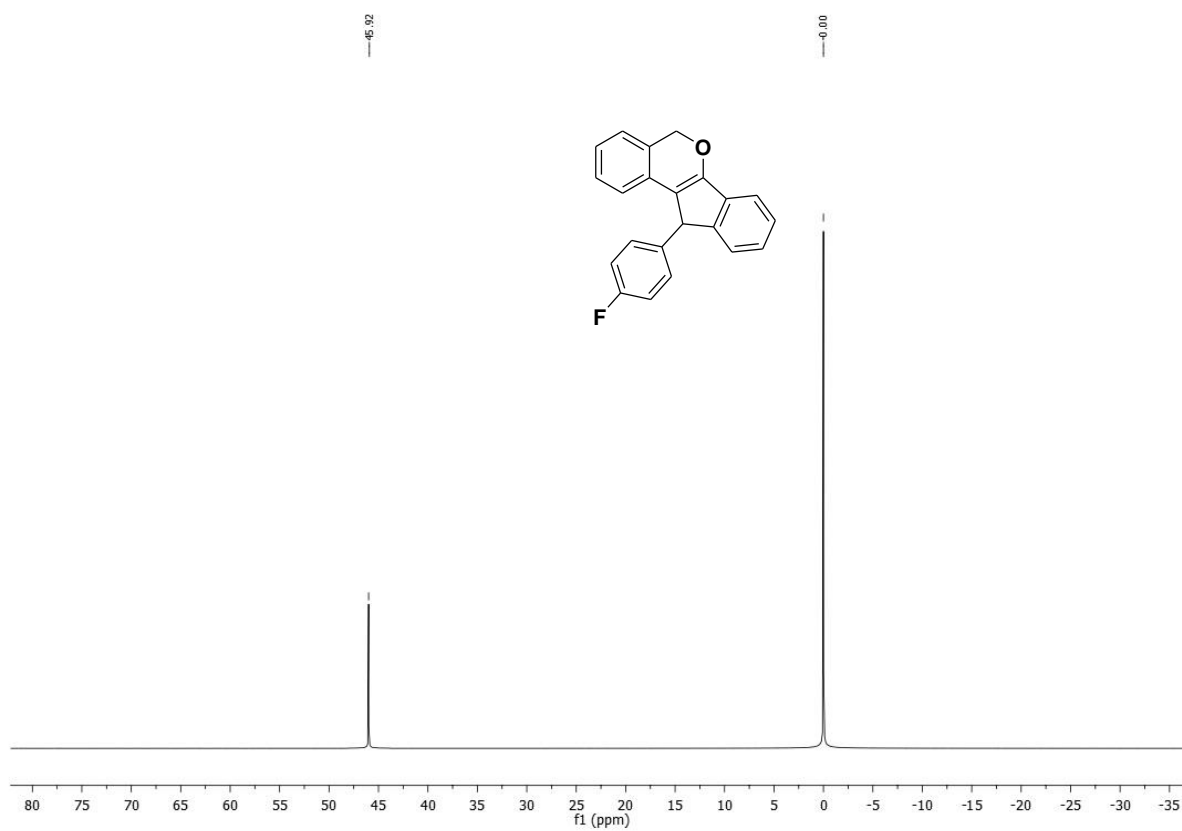

# $^1\text{H}$ NMR and $^{13}\text{C}$ NMR spectra of compound 3h

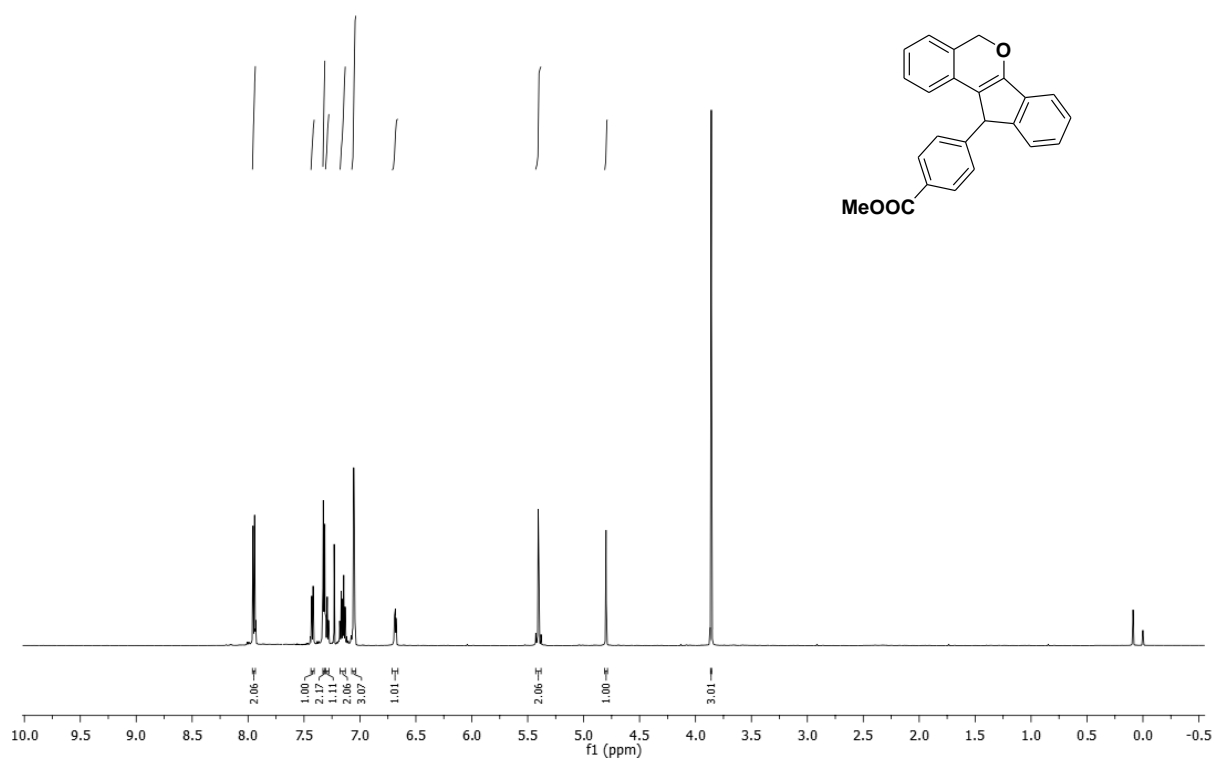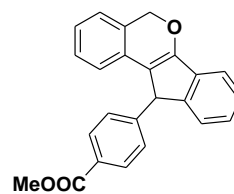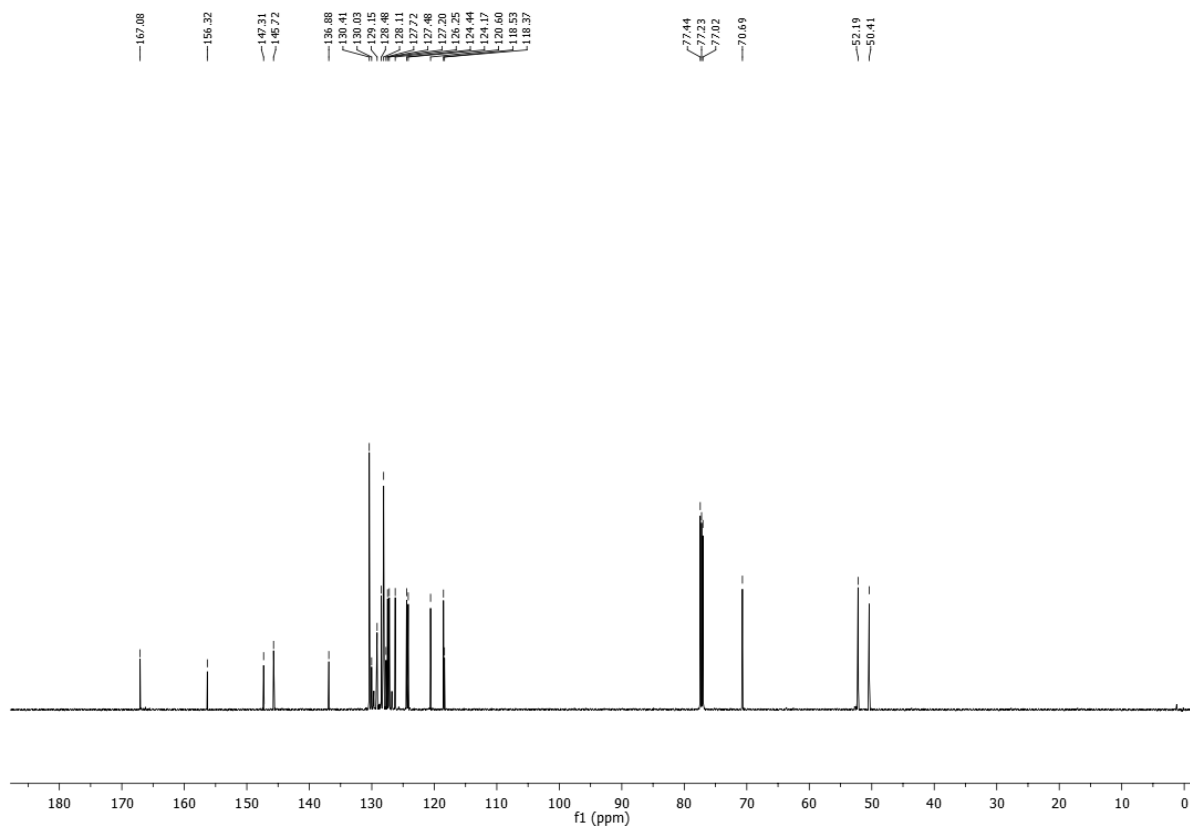

# $^1\text{H}$ NMR and $^{13}\text{C}$ NMR spectra of compound 3i

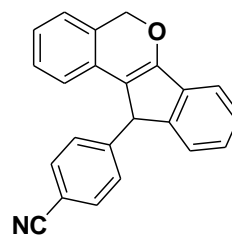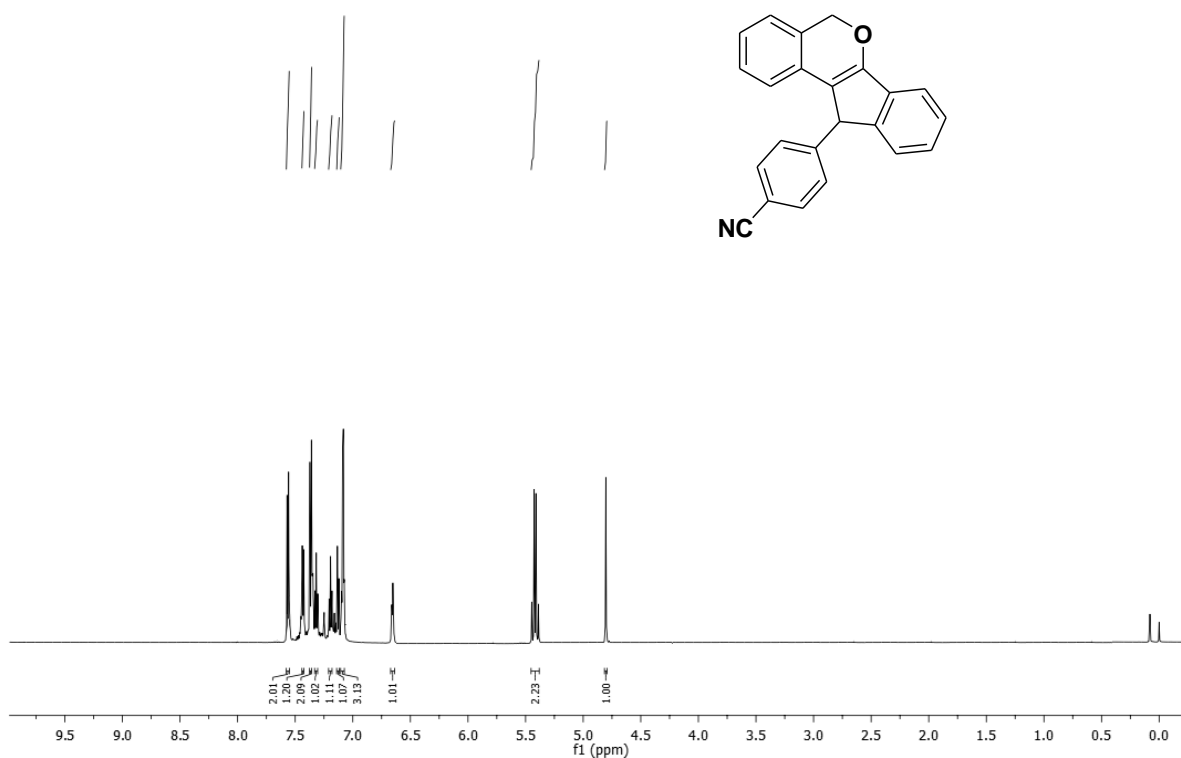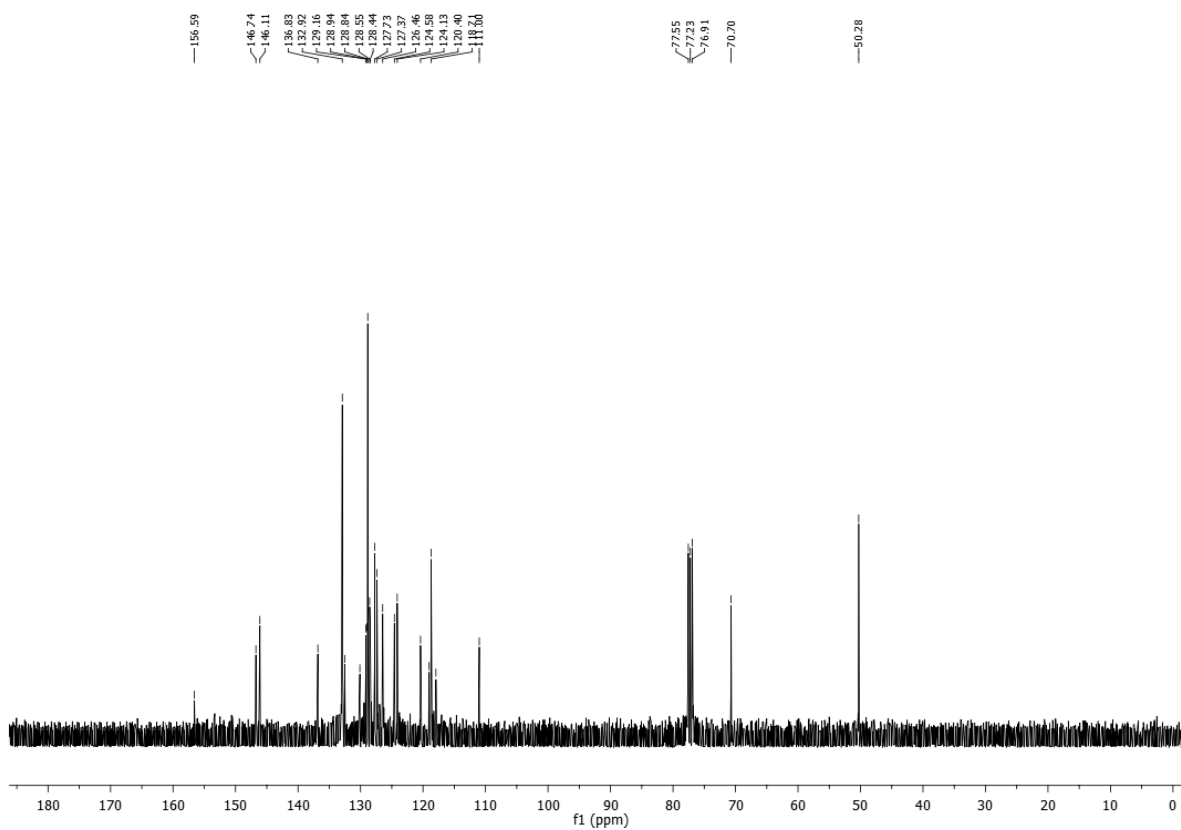

# <sup>1</sup>H NMR and <sup>13</sup>C NMR spectra of compound 3j

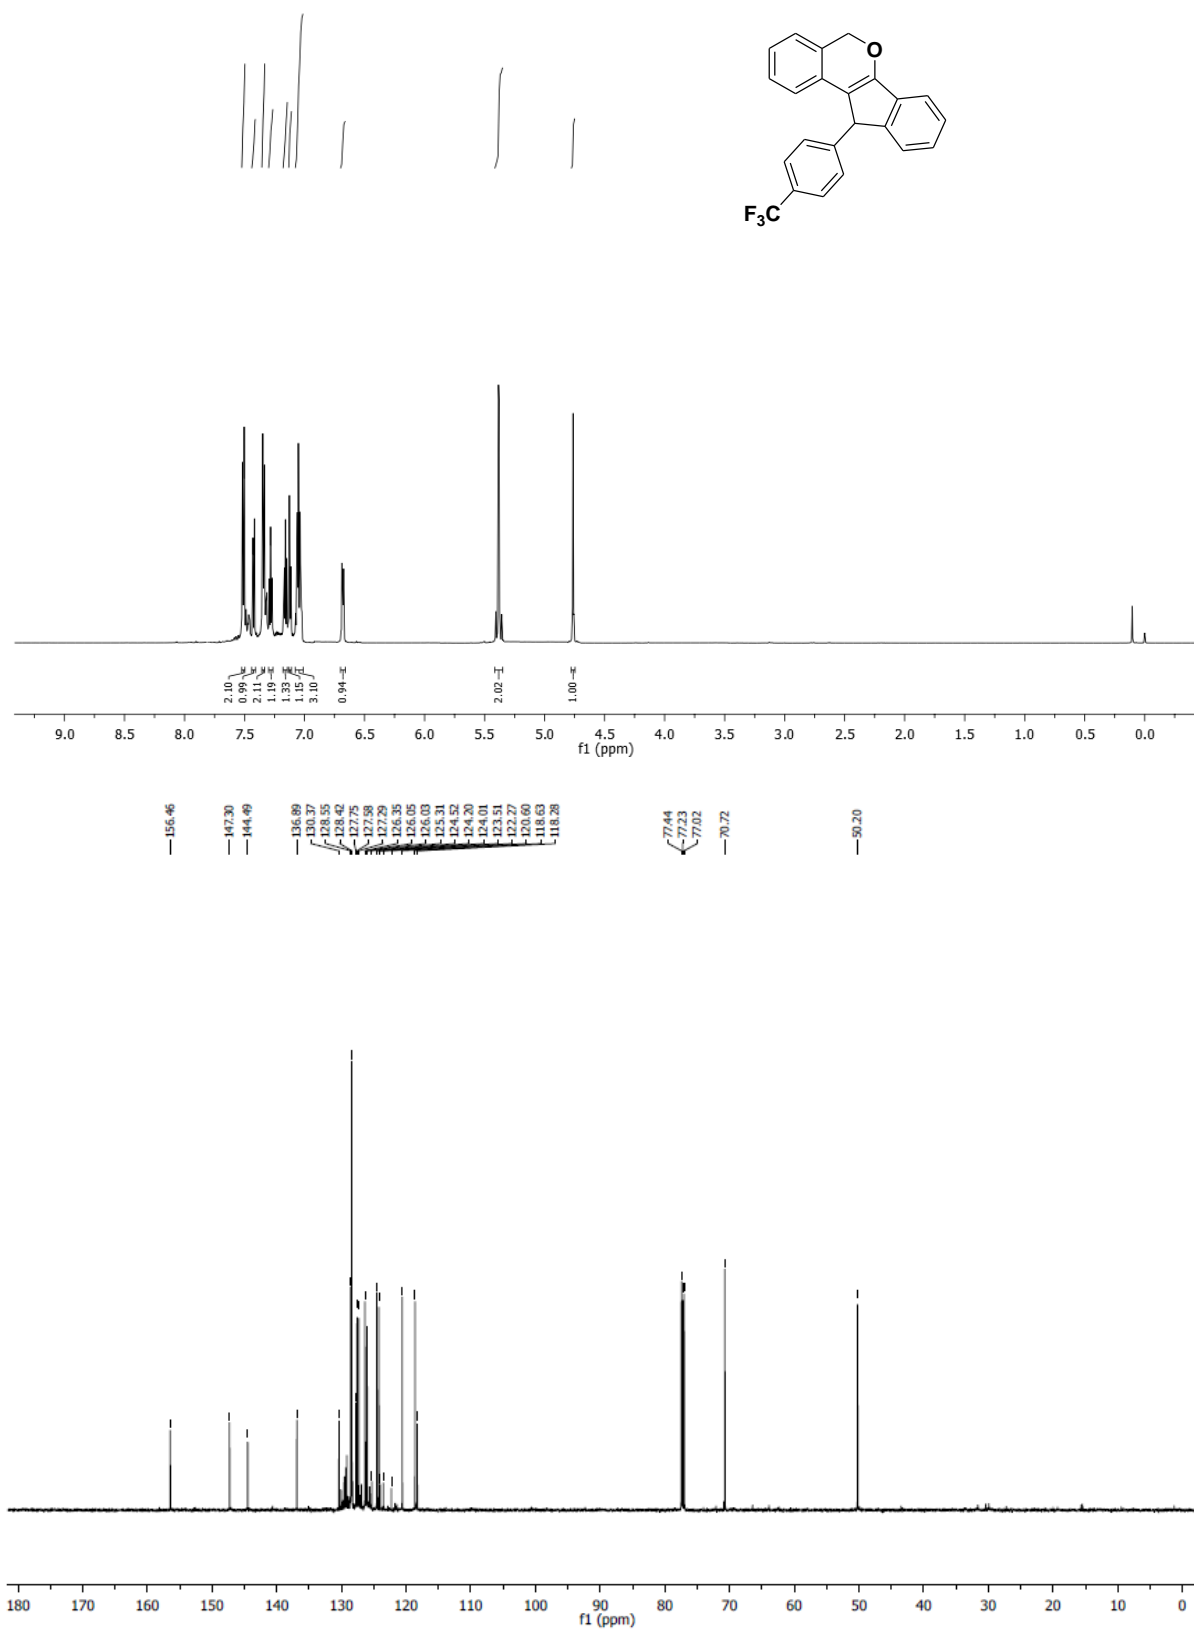

# <sup>19</sup>F NMR spectrum of compound 3j

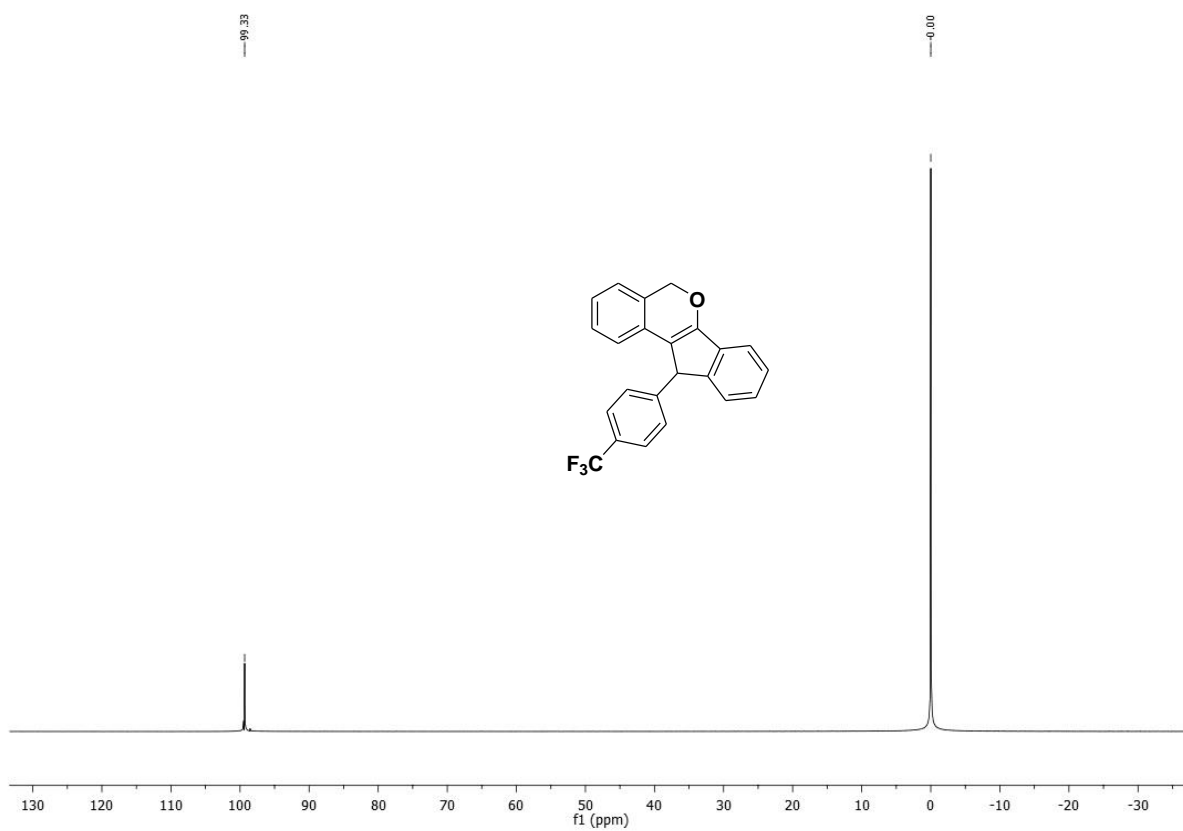

# $^1\text{H}$ NMR and $^{13}\text{C}$ NMR spectra of compound 3k

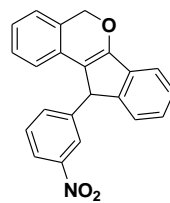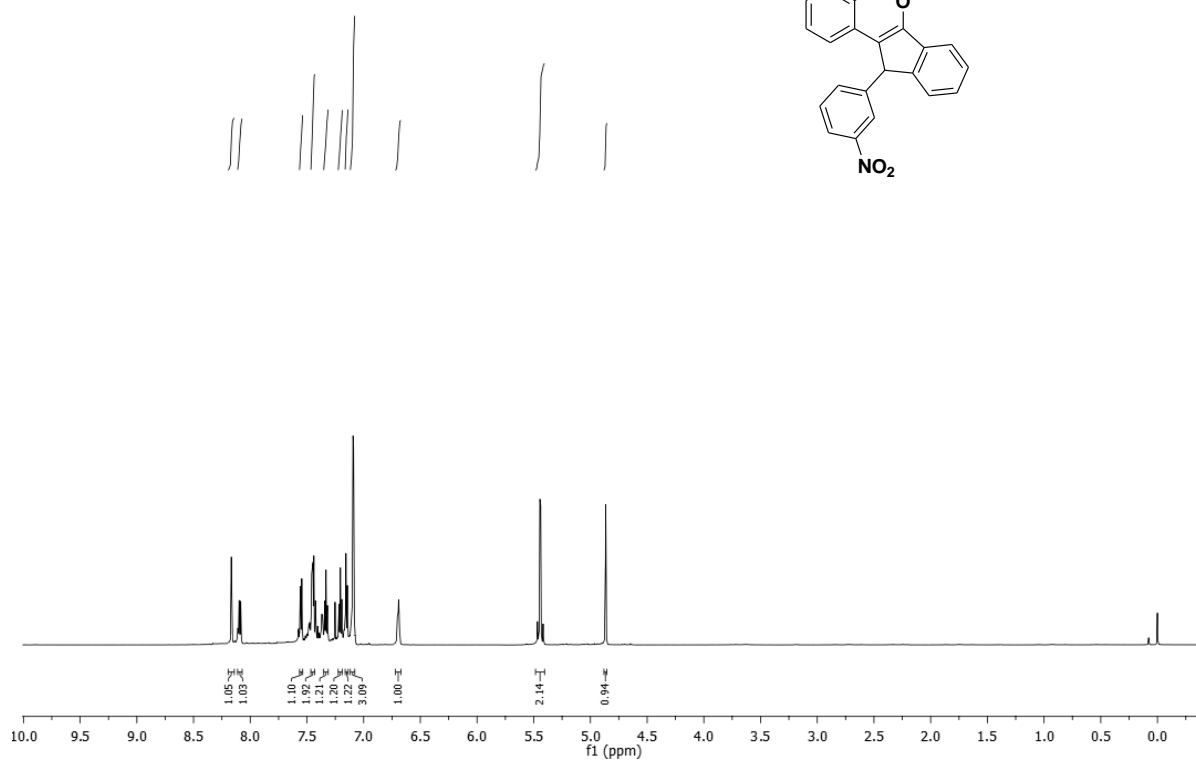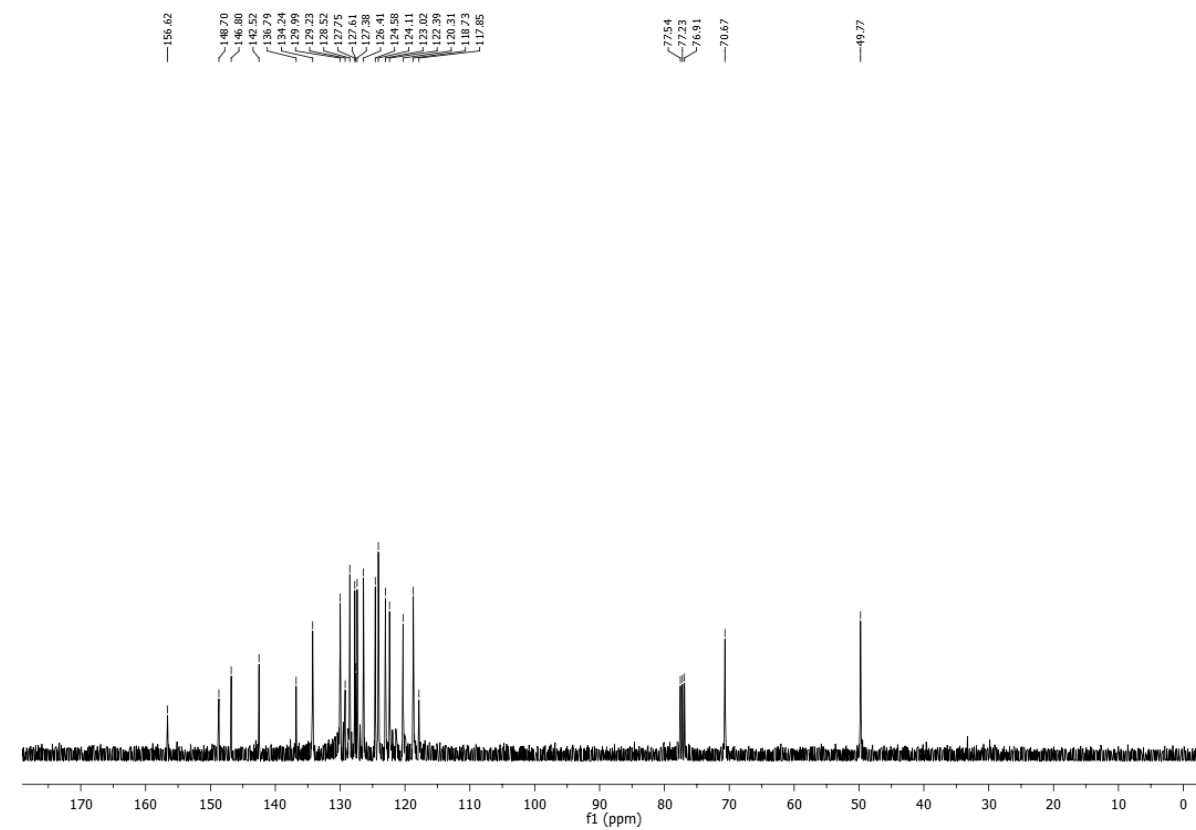

# $^1\text{H}$ NMR and $^{13}\text{C}$ NMR spectra of compound 31

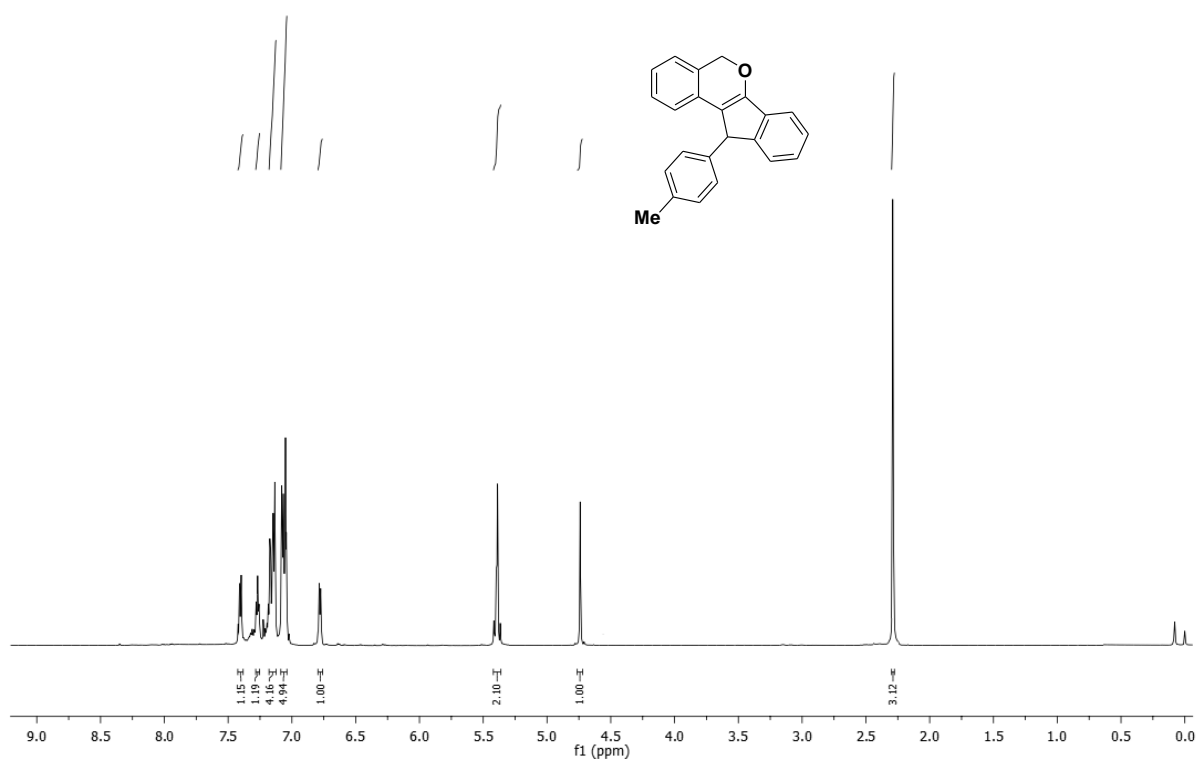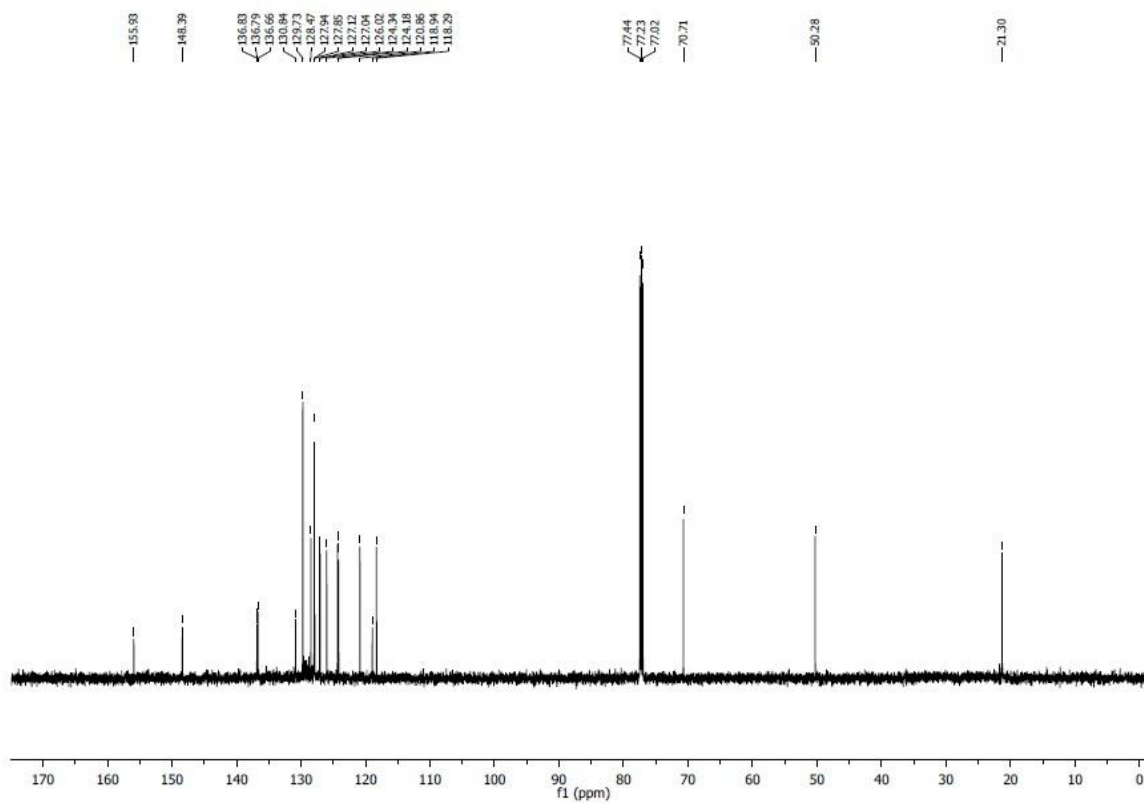

# $^1\text{H}$ NMR and $^{13}\text{C}$ NMR spectra of compound 3m

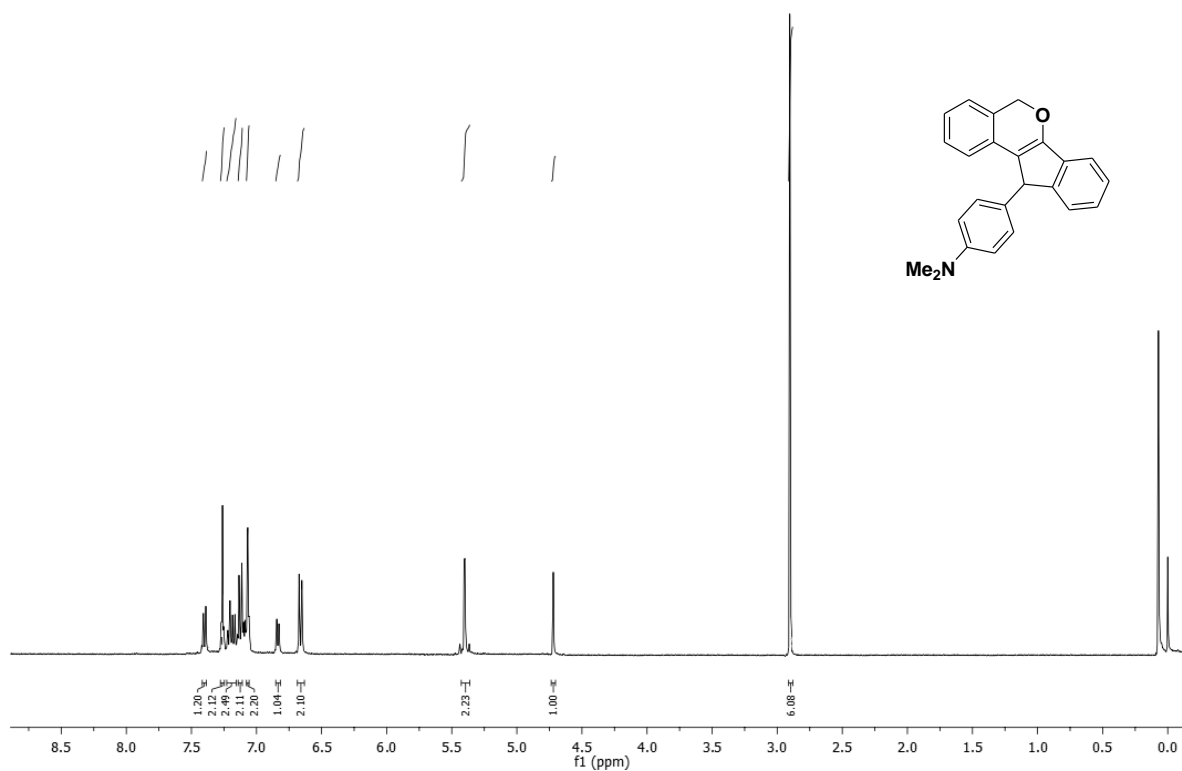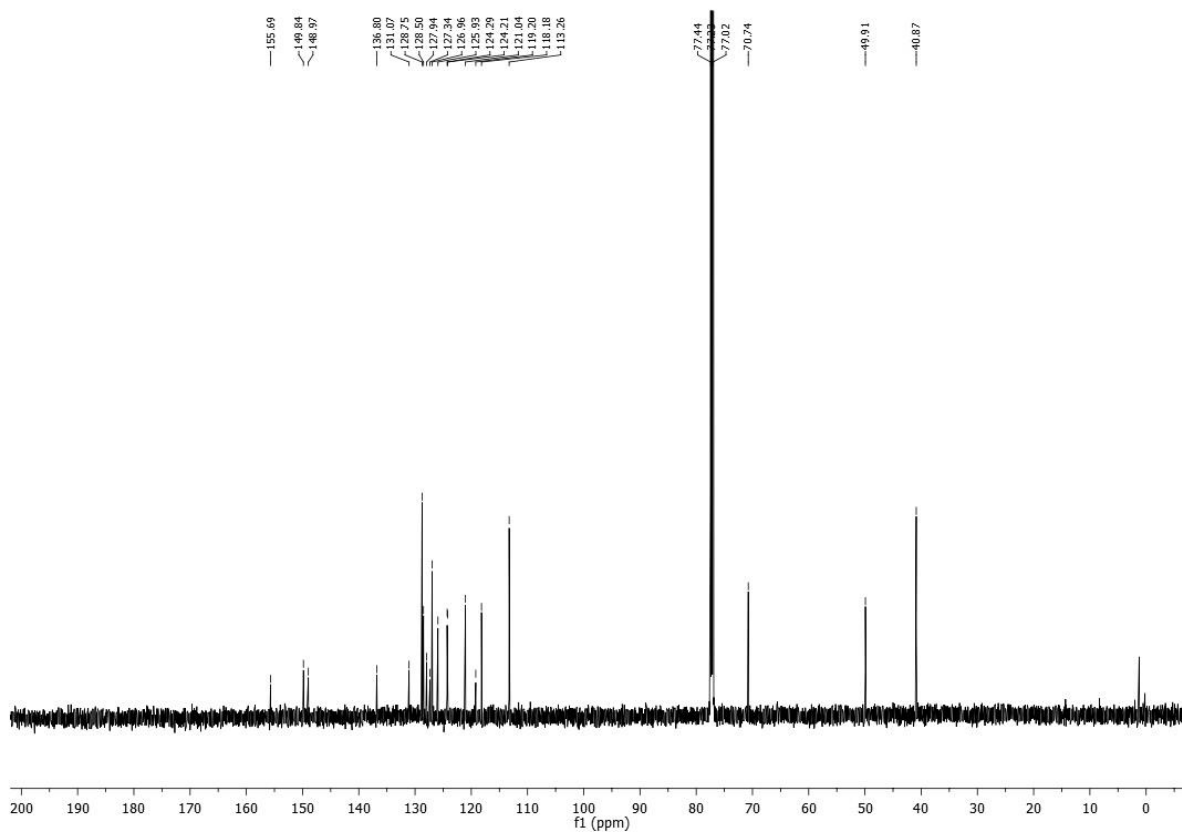



# $^1\text{H}$ NMR and $^{13}\text{C}$ NMR spectra of compound 3n

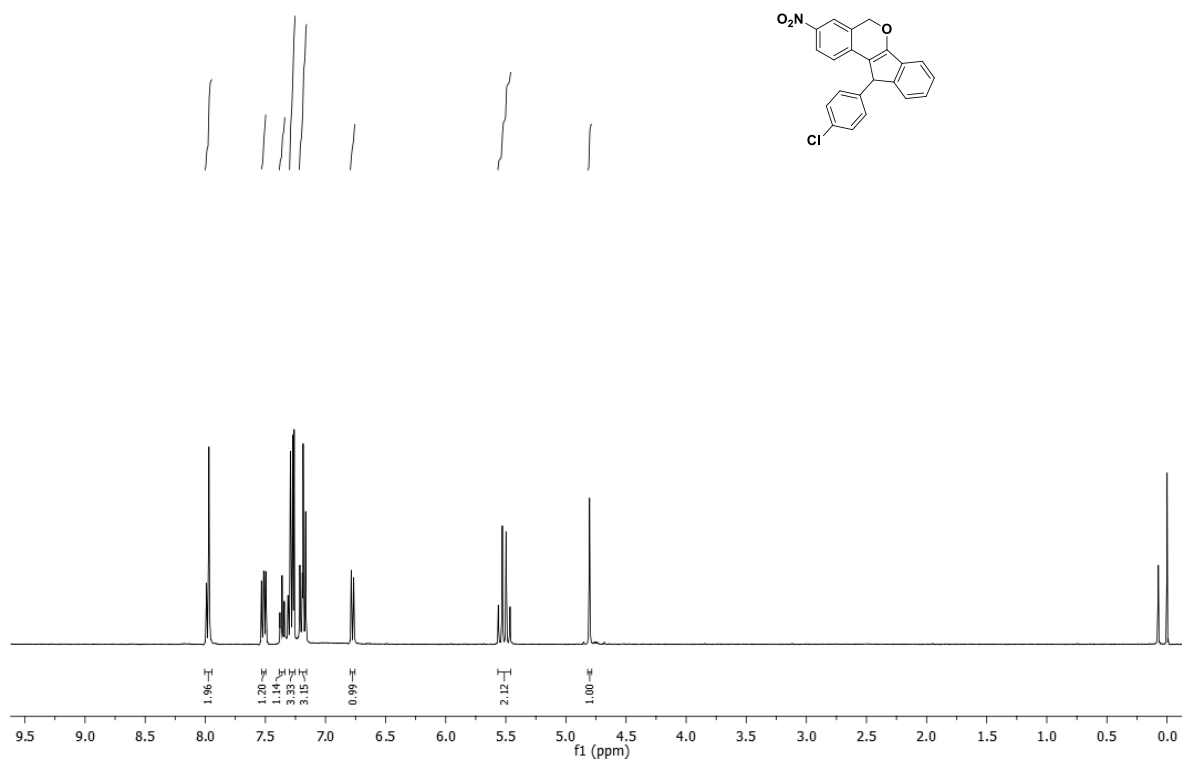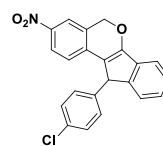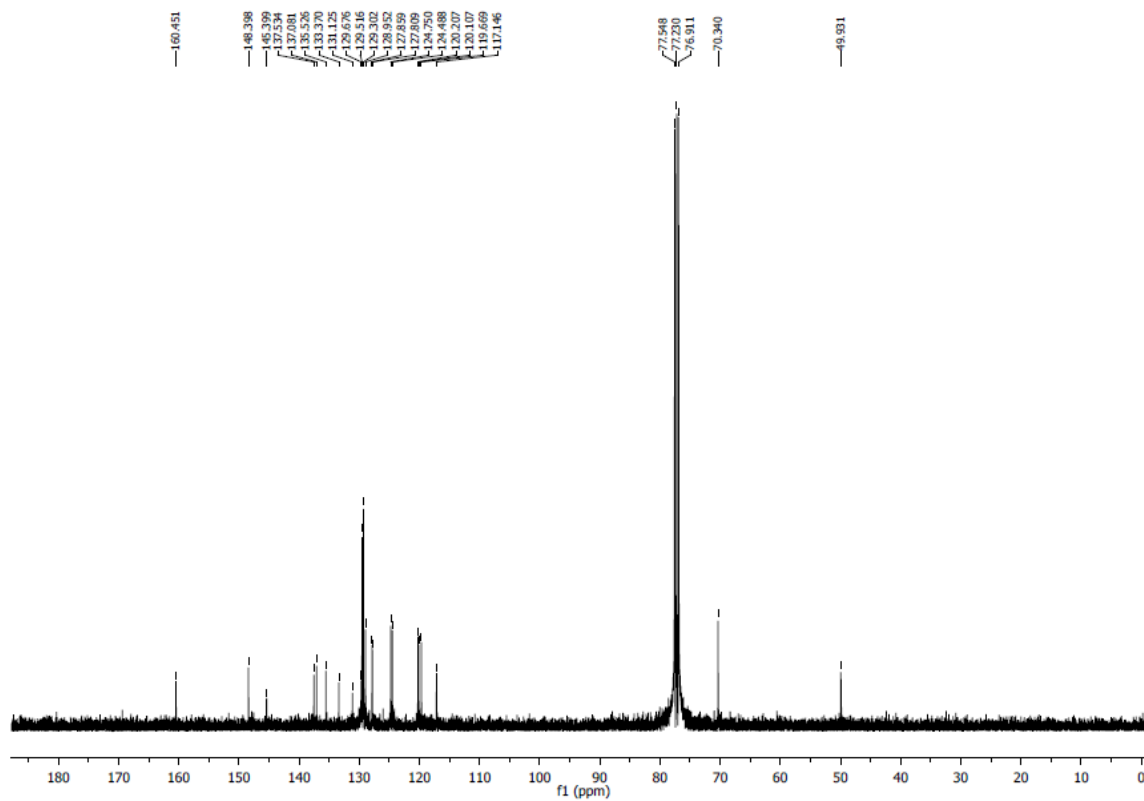

# <sup>1</sup>H NMR and <sup>13</sup>C NMR spectra of compound 3o

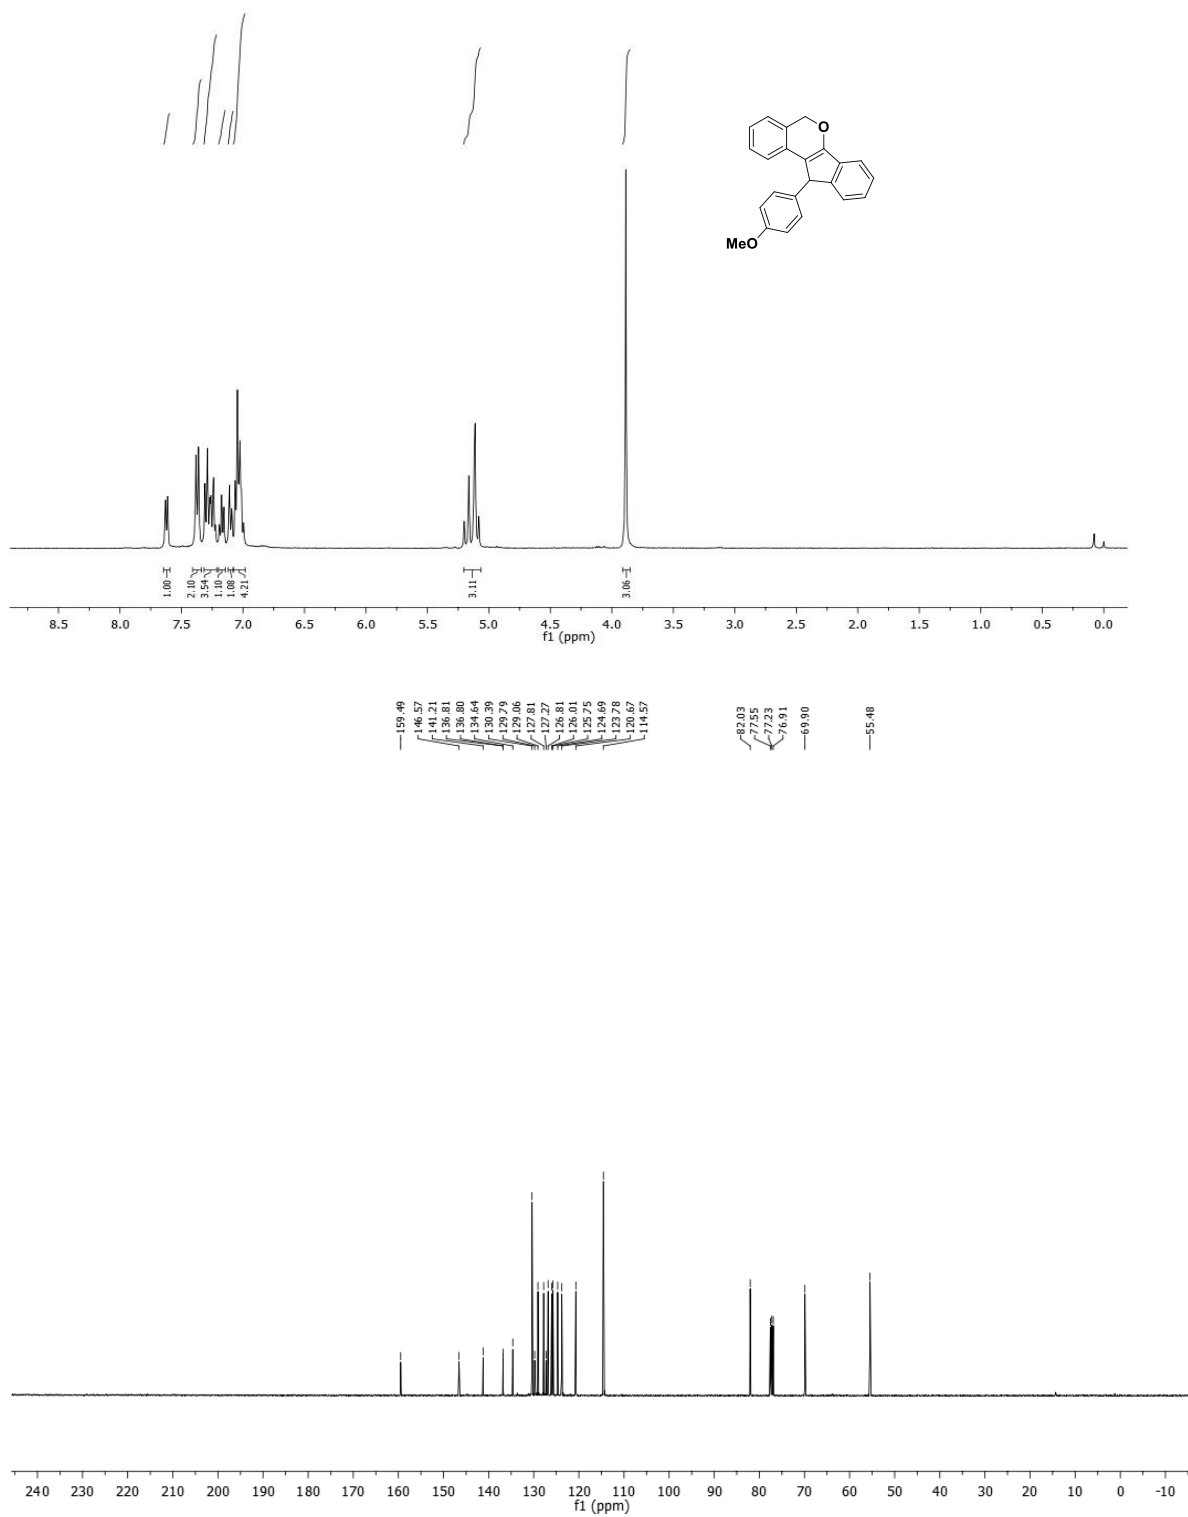

# $^1\text{H}$ NMR and $^{13}\text{C}$ NMR spectra of compound 3p

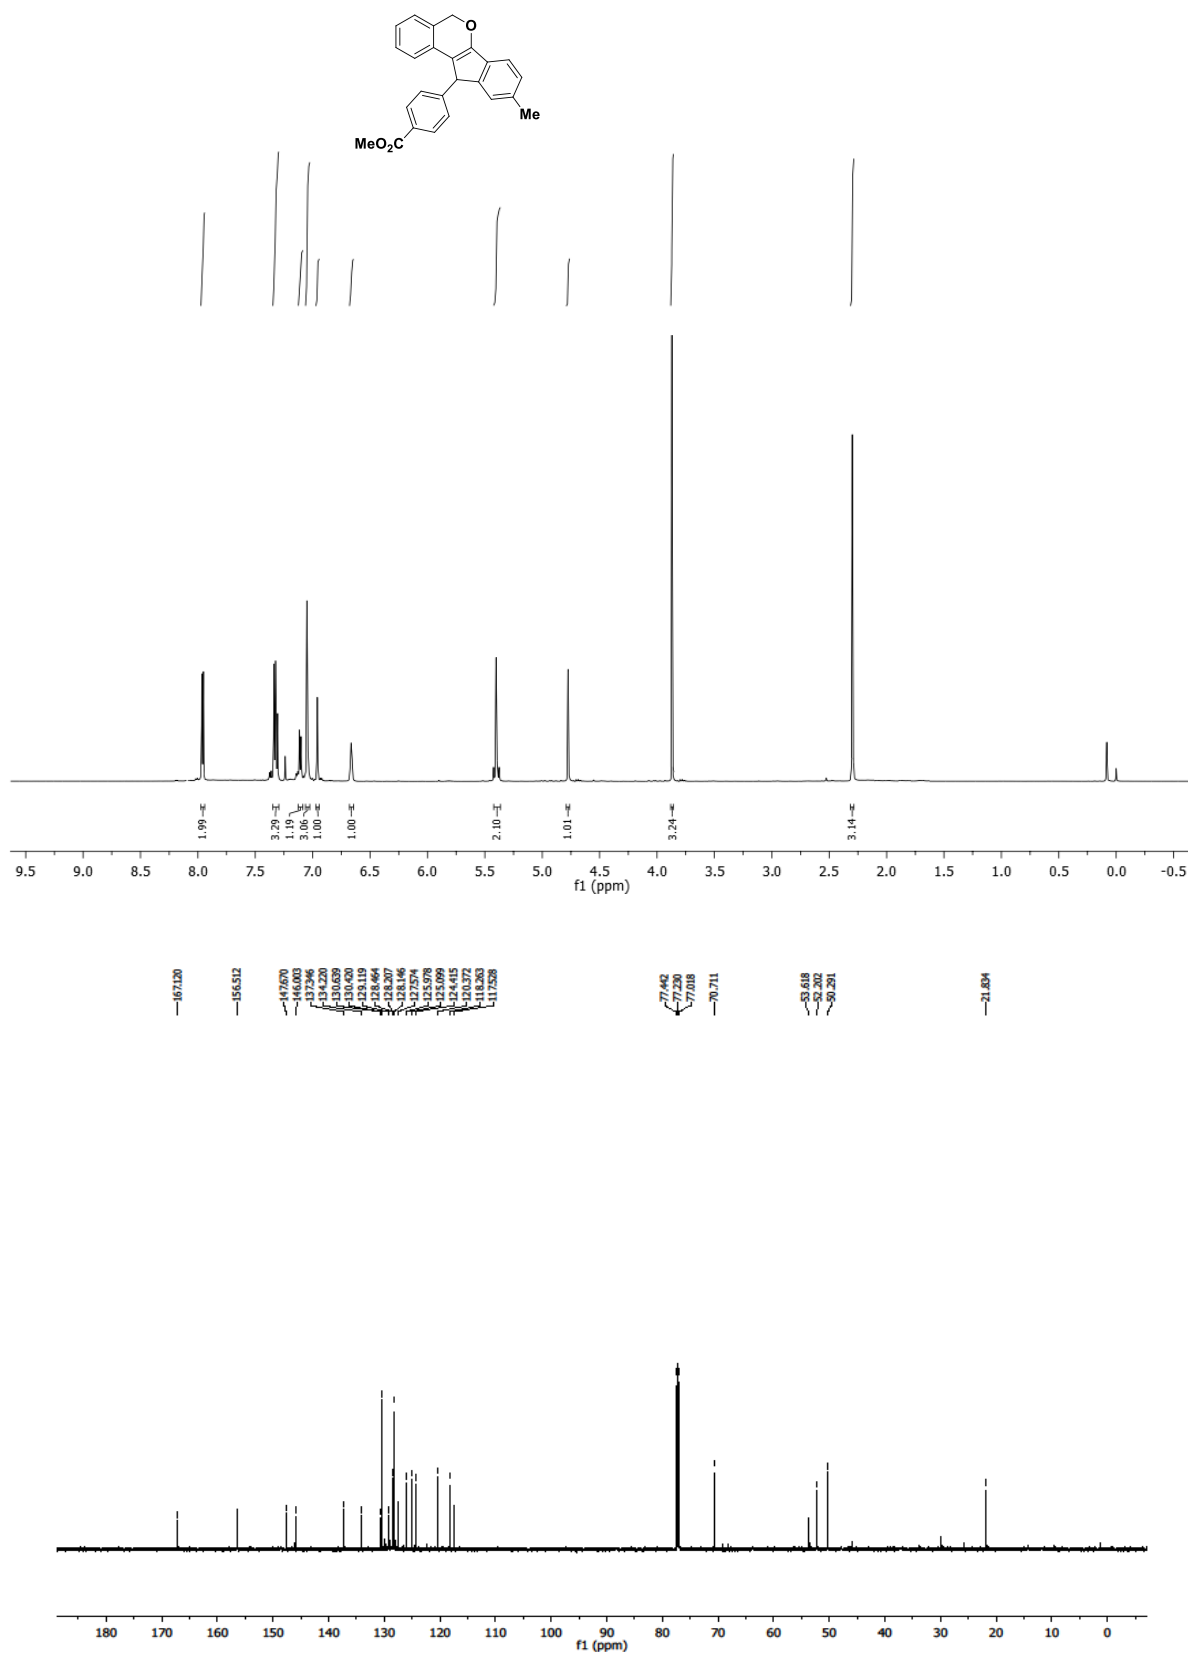

# <sup>1</sup>H NMR and <sup>13</sup>C NMR spectra of compound 3r

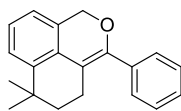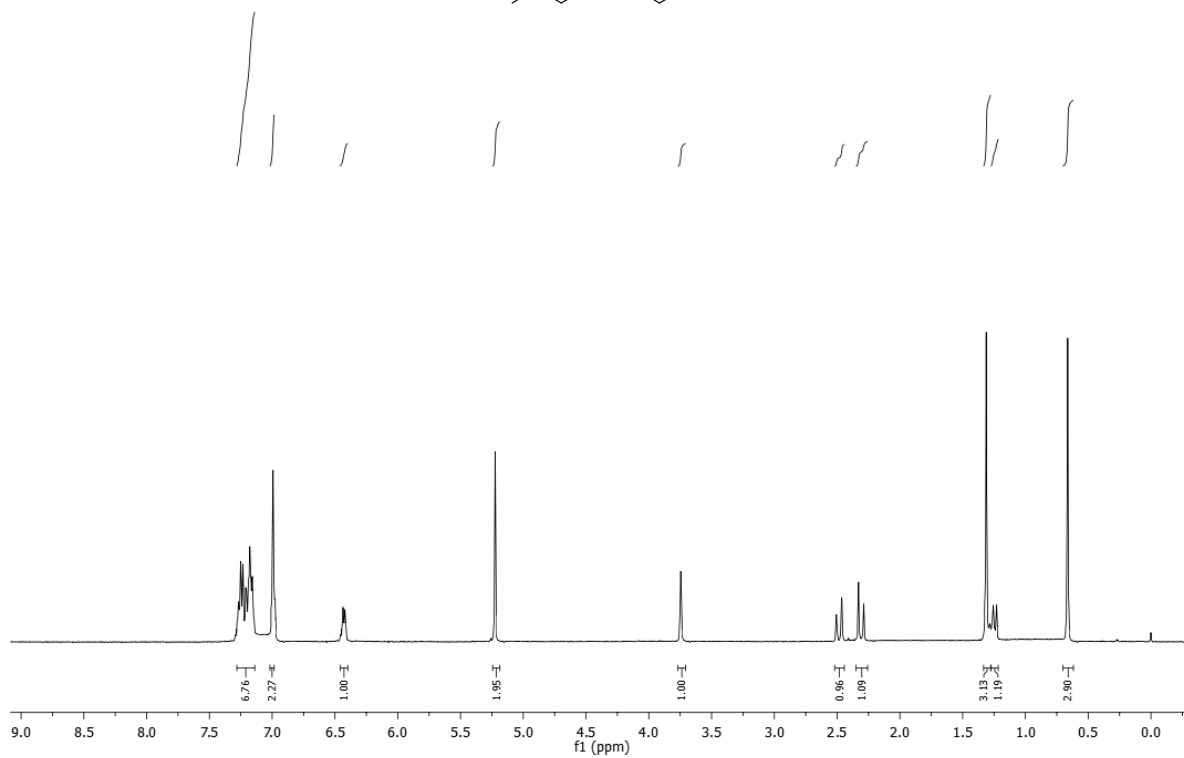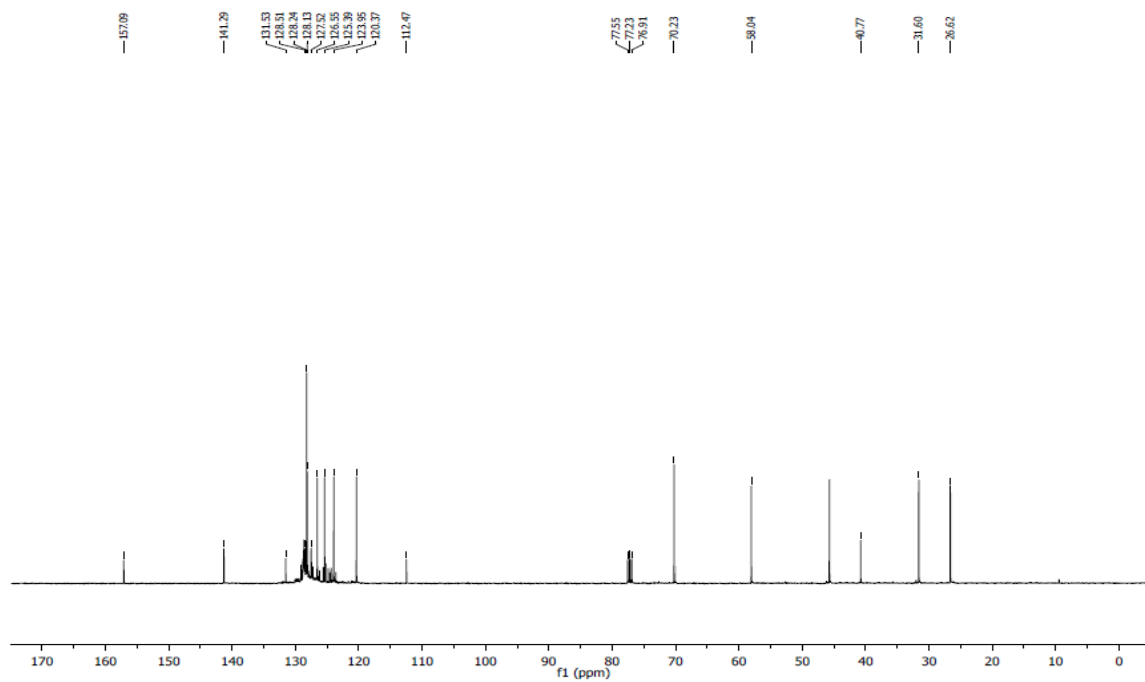

**The crystal parameters of compound 3b**

|                                                     | CCDC 1483531                                |
|-----------------------------------------------------|---------------------------------------------|
| Formula                                             | C <sub>22</sub> H <sub>14</sub> ClO         |
| Formula weight                                      | 329.78                                      |
| <i>T</i> /K                                         | 296(2)                                      |
| Crystal system                                      | Monoclinic                                  |
| Space group                                         | P21/c                                       |
| <i>a</i> /Å                                         | 17.382(19)                                  |
| <i>b</i> /Å                                         | 6.286(7)                                    |
| <i>c</i> /Å                                         | 17.040(18)                                  |
| $\alpha$ /°                                         | 90.00                                       |
| $\beta$ /°                                          | 117.003(18)                                 |
| $\gamma$ /°                                         | 90.00                                       |
| <i>V</i> /Å <sup>3</sup>                            | 1659(3)                                     |
| <i>Z</i>                                            | 4                                           |
| Abs. Coeff./mm <sup>-1</sup>                        | 0.234                                       |
| Abs. Correction                                     | multi-scan                                  |
| GOF on <i>F</i> <sup>2</sup>                        | 1.016                                       |
| Final <i>R</i> indices [ <i>I</i> > 2σ( <i>I</i> )] | <i>R</i> 1 = 0.0683<br><i>wR</i> 2 = 0.1508 |
| <i>R</i> indices [all data]                         | <i>R</i> 1 = 0.0915<br><i>wR</i> 2 = 0.1664 |

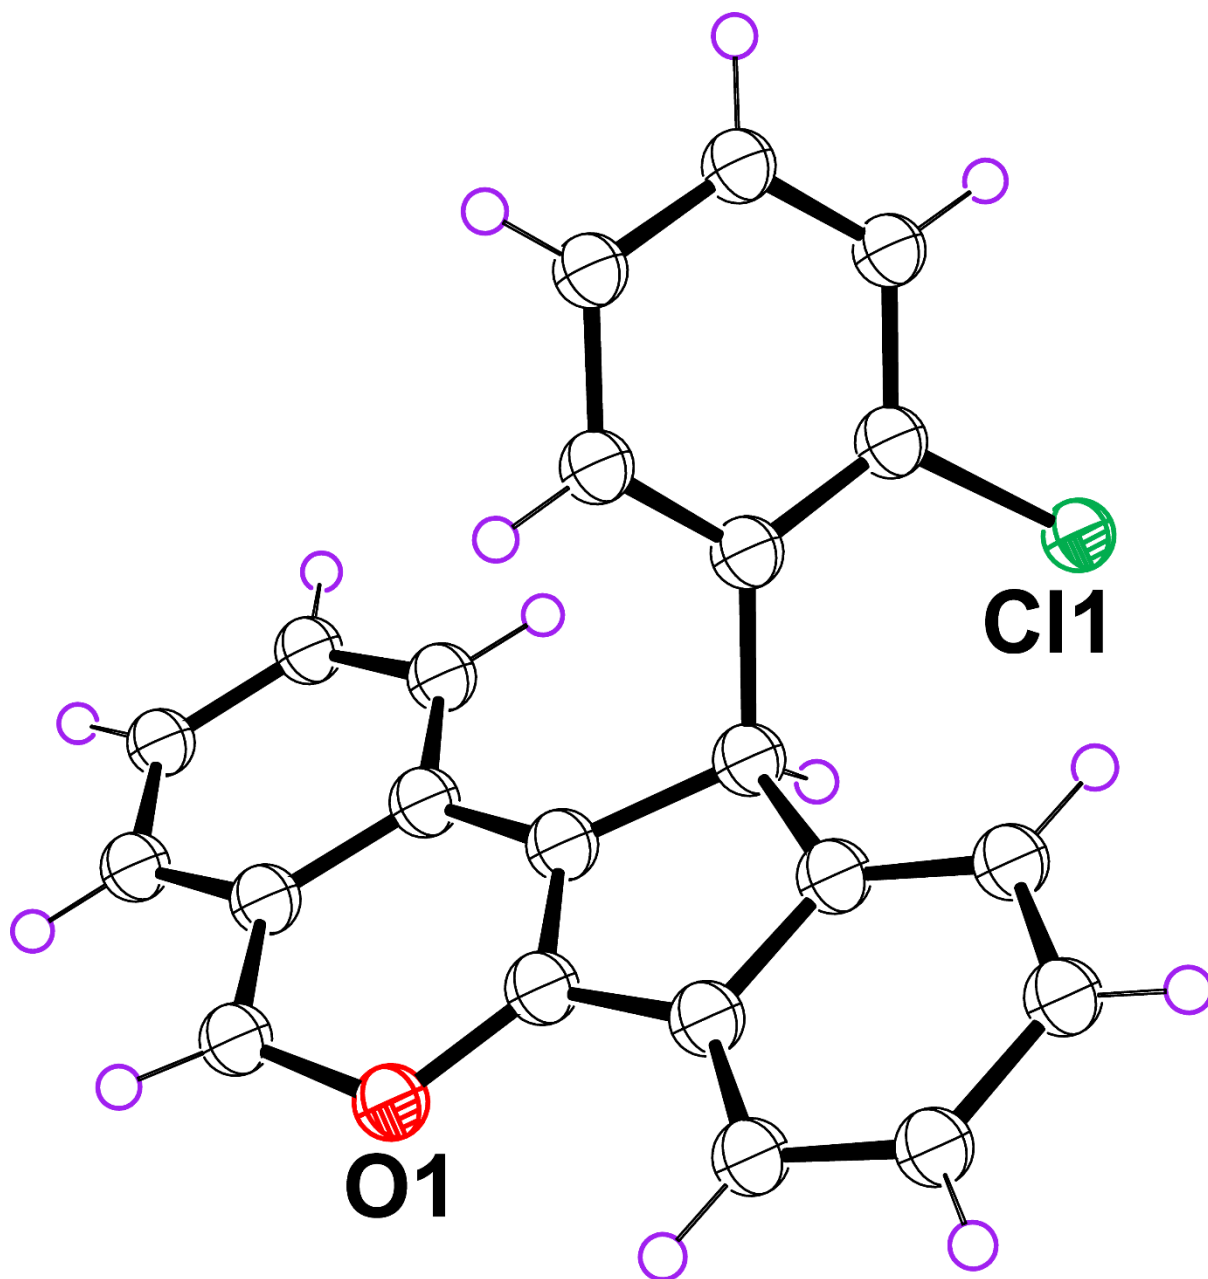

ORTEP diagram of compound **3b**, thermal ellipsoids are drawn on 50% probability level

## HRMS spectrum of compound 3a

|               |            |             |        |                 |              |                        |                      |
|---------------|------------|-------------|--------|-----------------|--------------|------------------------|----------------------|
| Sample Name   | GP-PH-27   | Position    | Vial 1 | Instrument Name | Instrument 1 | User Name              |                      |
| Inj Vol       | 0          | InjPosition |        | SampleType      | Sample       | IRM Calibration Status | Some Ions Missed     |
| Data Filename | GP-PH-27.d | ACQ Method  |        | Comment         |              | Acquired Time          | 6/27/2016 3:49:42 PM |

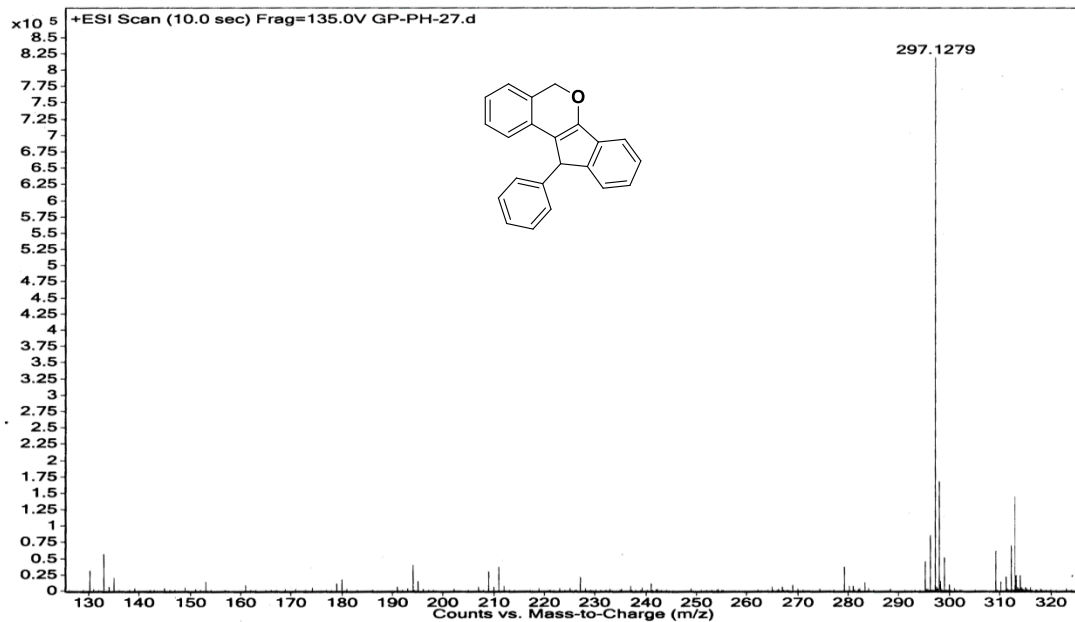

## HRMS spectrum of compound 3b

|               |             |             |             |                 |                                   |                        |                  |
|---------------|-------------|-------------|-------------|-----------------|-----------------------------------|------------------------|------------------|
| Sample Name   | Unavailable | Position    | Unavailable | Instrument Name | Unavailable                       | User Name              | Unavailable      |
| Inj Vol       | Unavailable | InjPosition | Unavailable | SampleType      | Unavailable                       | IRM Calibration Status | Some Ions Missed |
| Data Filename | GP-3CL.d    | ACQ Method  |             | Comment         | Sample information is unavailable | Acquired Time          | Unavailable      |

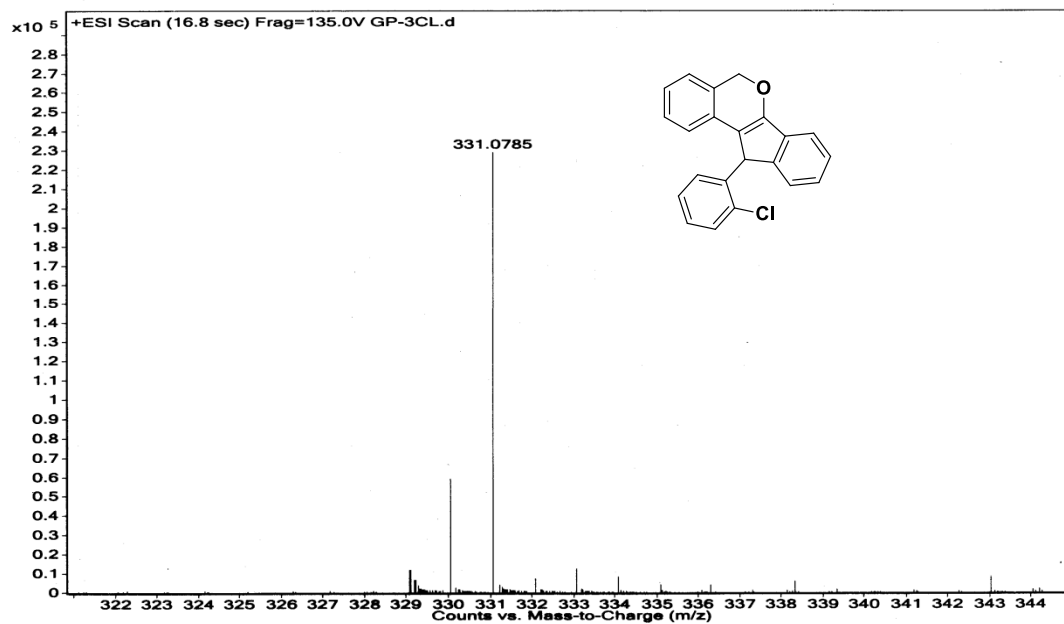

## HRMS spectrum of compound 3c

|               |               |             |        |                 |              |                        |                      |
|---------------|---------------|-------------|--------|-----------------|--------------|------------------------|----------------------|
| Sample Name   | GP-2CL-18-1   | Position    | Vial 1 | Instrument Name | Instrument 1 | User Name              |                      |
| Inj Vol       | 0             | InjPosition |        | SampleType      | Sample       | IRM Calibration Status | All Ions Missed      |
| Data Filename | GP-2CL-18-1.d | ACQ Method  |        | Comment         |              | Acquired Time          | 7/18/2016 5:26:14 PM |

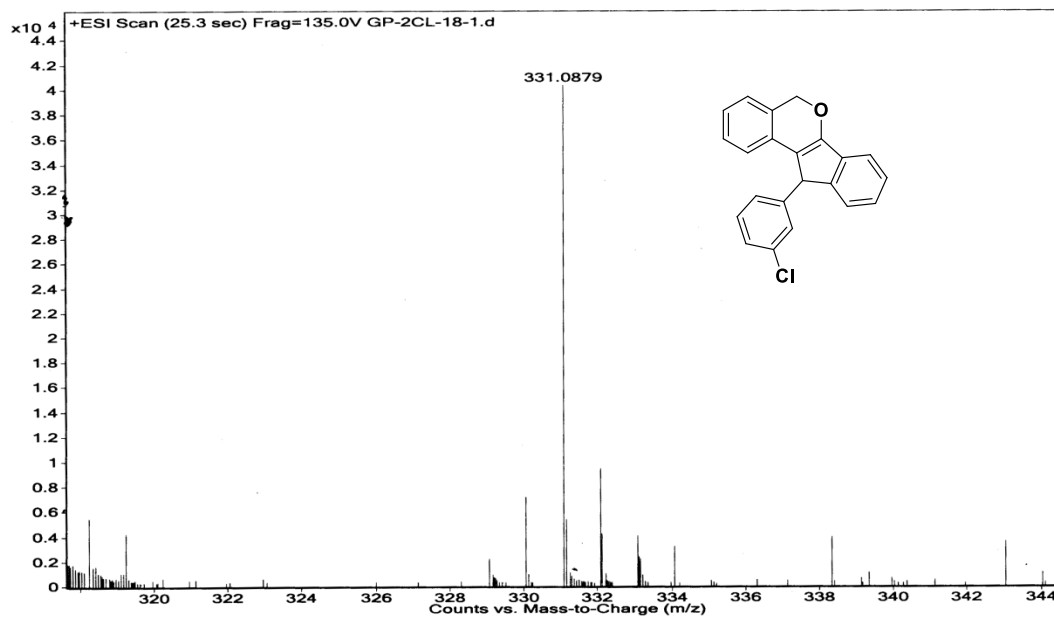

## HRMS spectrum of compound 3d

|               |          |             |        |                 |              |                        |                       |
|---------------|----------|-------------|--------|-----------------|--------------|------------------------|-----------------------|
| Sample Name   | GP-CLP   | Position    | Vial 1 | Instrument Name | Instrument 1 | User Name              |                       |
| Inj Vol       | 0        | InjPosition |        | SampleType      | Sample       | IRM Calibration Status | Some Ions Missed      |
| Data Filename | GP-CLP.d | ACQ Method  |        | Comment         |              | Acquired Time          | 7/19/2016 11:02:59 AM |

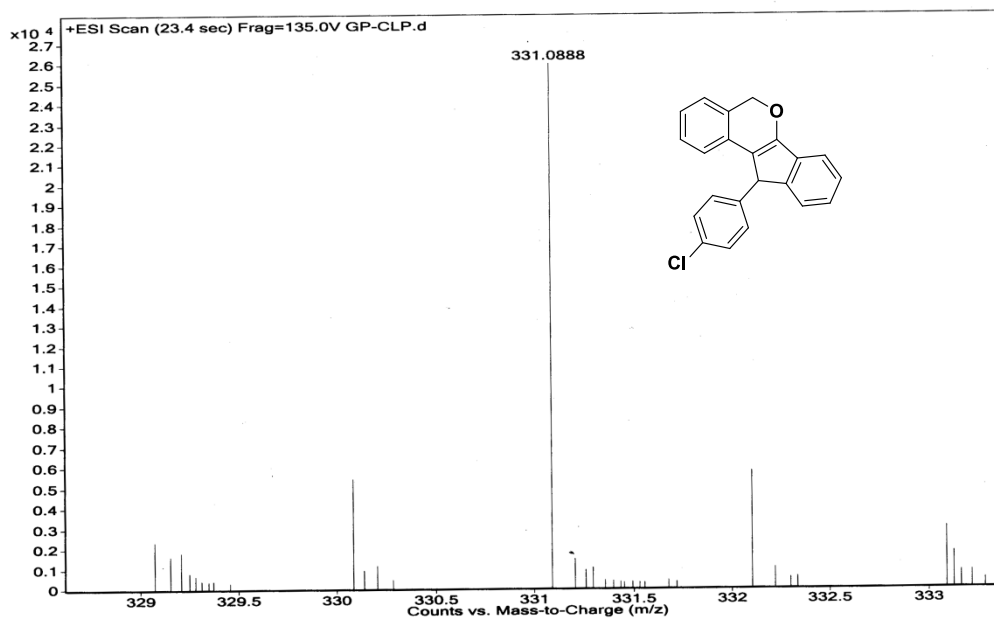



## HRMS spectrum of compound 3e

|               |             |             |             |                 |                                   |                        |                 |
|---------------|-------------|-------------|-------------|-----------------|-----------------------------------|------------------------|-----------------|
| Sample Name   | Unavailable | Position    | Unavailable | Instrument Name | Unavailable                       | User Name              | Unavailable     |
| Inj Vol       | Unavailable | InjPosition | Unavailable | SampleType      | Unavailable                       | IRM Calibration Status | All Ions Missed |
| Data Filename | GP-DICL-1.d | ACQ Method  |             | Comment         | Sample information is unavailable | Acquired Time          | Unavailable     |

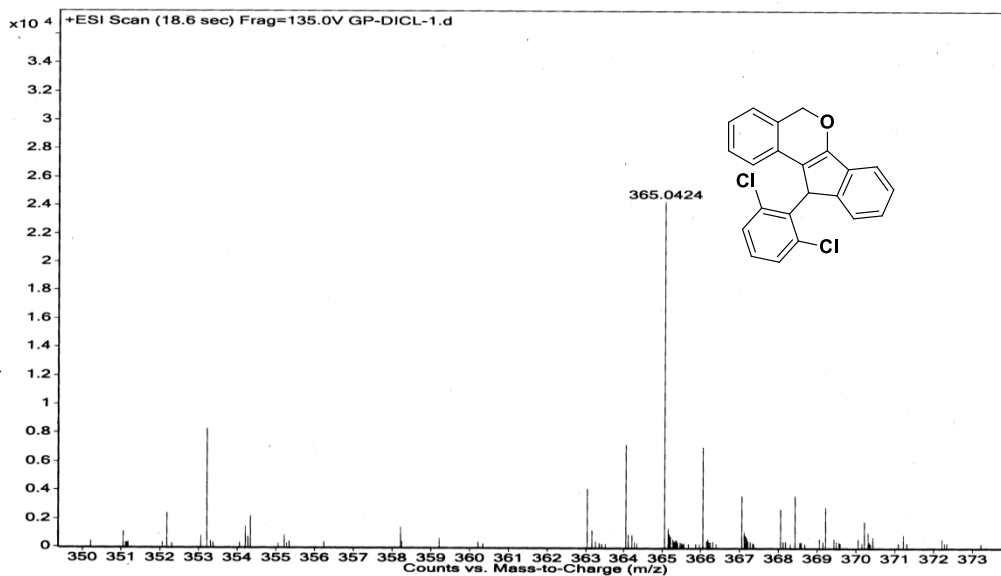

## HRMS spectrum of compound 3f

|               |             |             |             |                 |                                   |                        |                  |
|---------------|-------------|-------------|-------------|-----------------|-----------------------------------|------------------------|------------------|
| Sample Name   | Unavailable | Position    | Unavailable | Instrument Name | Unavailable                       | User Name              | Unavailable      |
| Inj Vol       | Unavailable | InjPosition | Unavailable | SampleType      | Unavailable                       | IRM Calibration Status | Some Ions Missed |
| Data Filename | GP-CF3.d    | ACQ Method  |             | Comment         | Sample information is unavailable | Acquired Time          | Unavailable      |

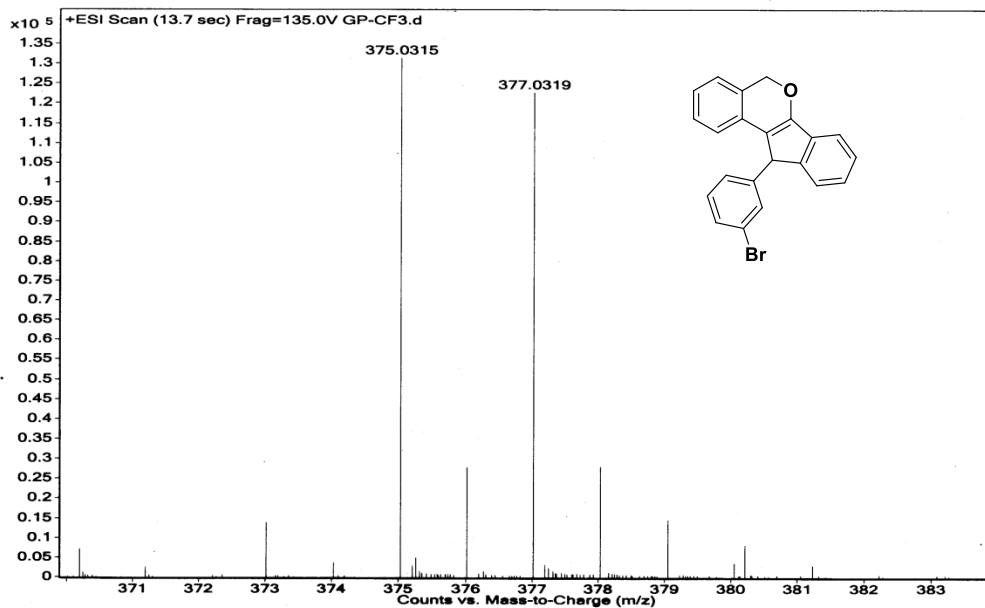

## HRMS spectrum of compound 3g

|               |           |             |        |                 |              |                        |                      |
|---------------|-----------|-------------|--------|-----------------|--------------|------------------------|----------------------|
| Sample Name   | GP-F-27   | Position    | Vial 1 | Instrument Name | Instrument 1 | User Name              |                      |
| Inj Vol       | 0         | InjPosition |        | SampleType      | Sample       | IRM Calibration Status | Some Ions Missed     |
| Data Filename | GP-F-27.d | ACQ Method  |        | Comment         |              | Acquired Time          | 6/27/2016 3:45:31 PM |

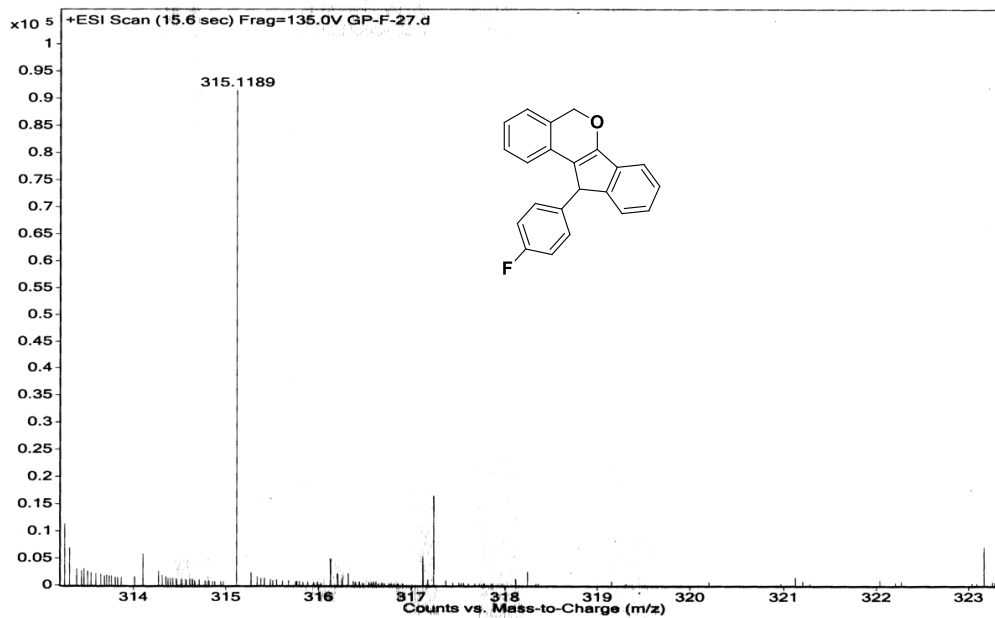

## HRMS spectrum of compound 3h

|               |             |             |             |                 |                                   |                        |                  |
|---------------|-------------|-------------|-------------|-----------------|-----------------------------------|------------------------|------------------|
| Sample Name   | Unavailable | Position    | Unavailable | Instrument Name | Unavailable                       | User Name              | Unavailable      |
| Inj Vol       | Unavailable | InjPosition | Unavailable | SampleType      | Unavailable                       | IRM Calibration Status | Some Ions Missed |
| Data Filename | GP-COOME.d  | ACQ Method  |             | Comment         | Sample information is unavailable | Acquired Time          | Unavailable      |

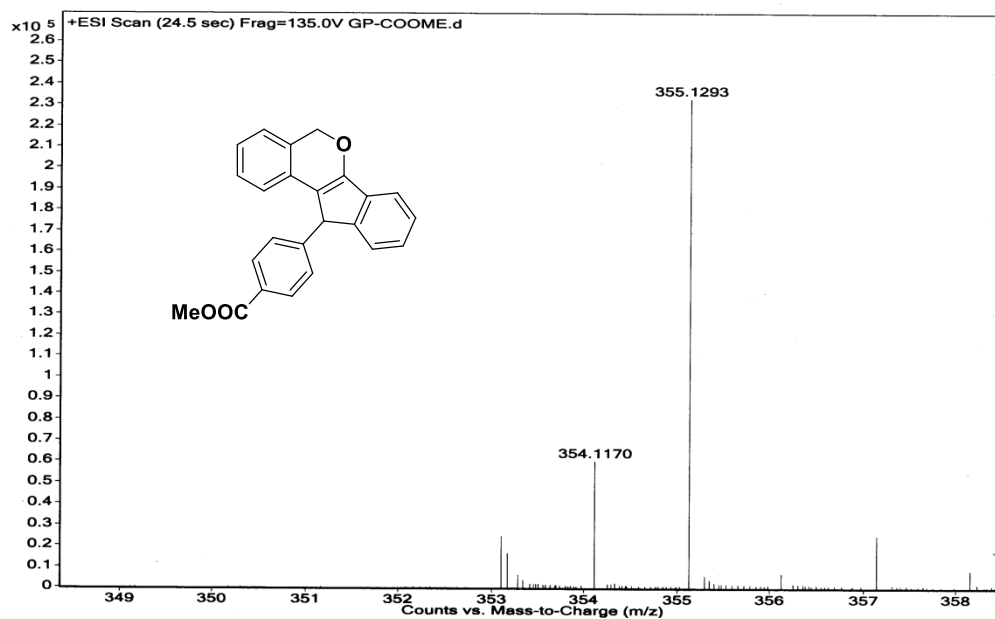

## HRMS spectrum of compound 3i

|               |         |             |        |                 |              |                        |                      |
|---------------|---------|-------------|--------|-----------------|--------------|------------------------|----------------------|
| Sample Name   | GP-CN   | Position    | Vial 1 | Instrument Name | Instrument 1 | User Name              |                      |
| Inj Vol       | 0       | InjPosition |        | SampleType      | Sample       | IRM Calibration Status | Some Ions Missed     |
| Data Filename | GP-CN.d | ACQ Method  |        | Comment         |              | Acquired Time          | 5/24/2016 2:57:15 PM |

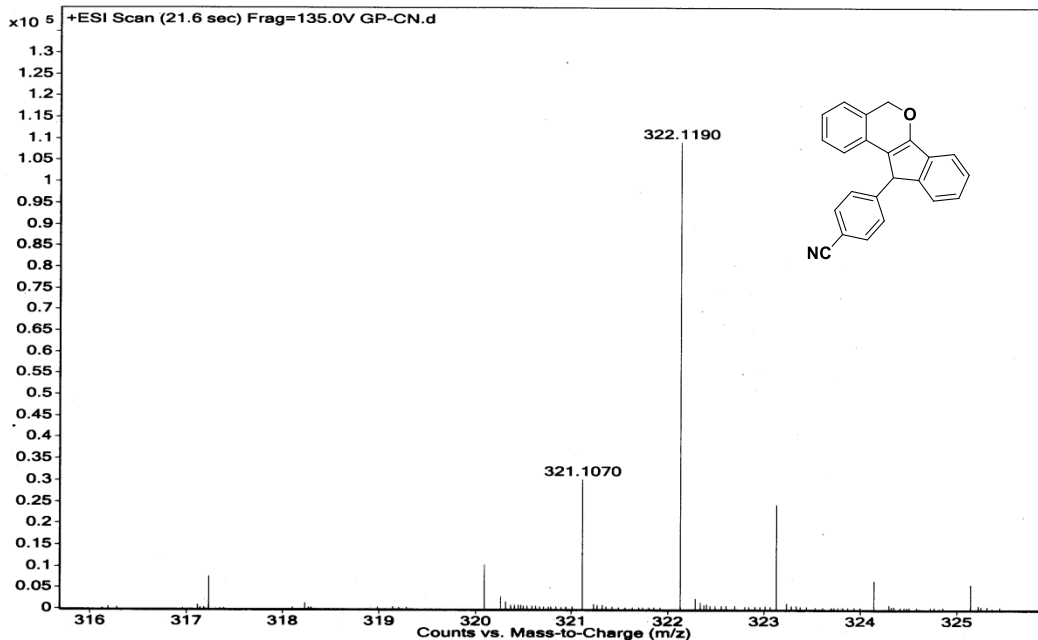

## HRMS spectrum of compound 3j

|               |             |             |             |                 |                                   |                        |                  |
|---------------|-------------|-------------|-------------|-----------------|-----------------------------------|------------------------|------------------|
| Sample Name   | Unavailable | Position    | Unavailable | Instrument Name | Unavailable                       | User Name              | Unavailable      |
| Inj Vol       | Unavailable | InjPosition | Unavailable | SampleType      | Unavailable                       | IRM Calibration Status | Some Ions Missed |
| Data Filename | GP-BR-1.d   | ACQ Method  |             | Comment         | Sample information is unavailable | Acquired Time          | Unavailable      |

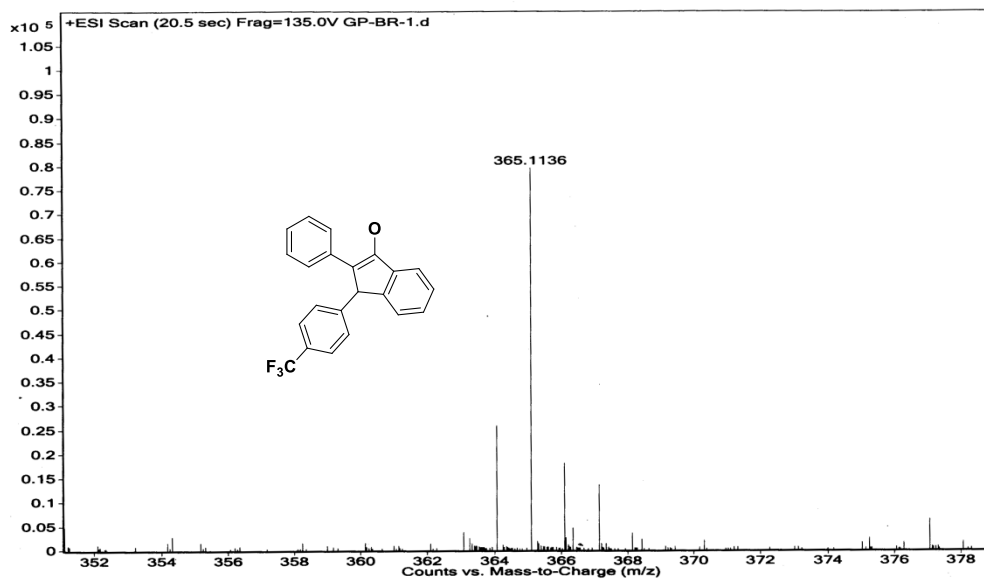



## HRMS spectrum of compound 3m

|               |              |             |        |                 |              |                        |                      |
|---------------|--------------|-------------|--------|-----------------|--------------|------------------------|----------------------|
| Sample Name   | GP-NME2-27   | Position    | Vial 1 | Instrument Name | Instrument 1 | User Name              |                      |
| Inj Vol       | 0            | InjPosition |        | SampleType      | Sample       | IRM Calibration Status | Some Ions Missed     |
| Data Filename | GP-NME2-27.d | ACQ Method  |        | Comment         |              | Acquired Time          | 6/27/2016 3:47:31 PM |

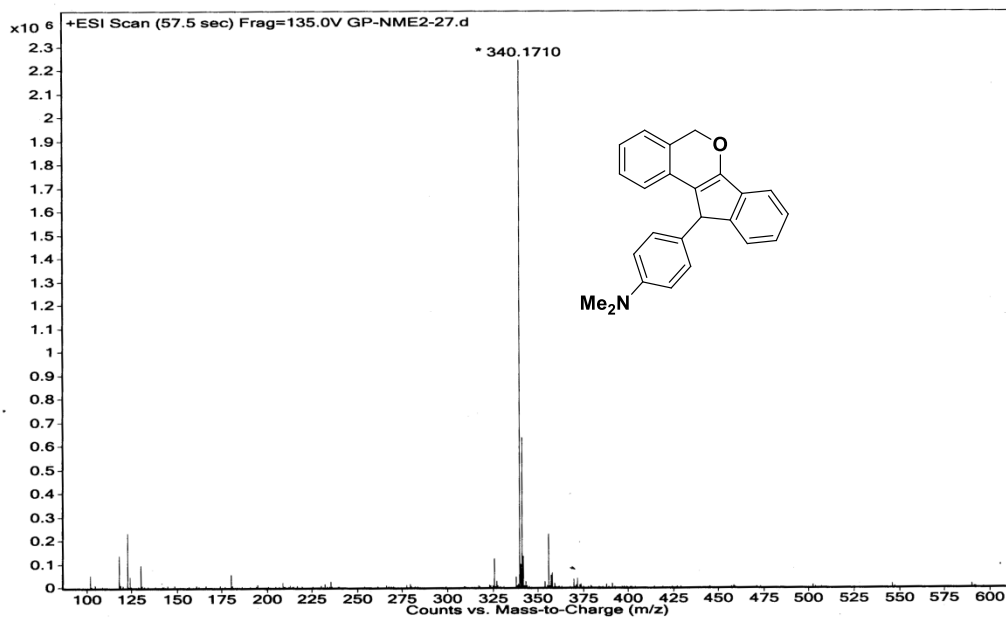

## HRMS spectrum of compound 3n

|               |               |             |        |                 |              |                        |                       |
|---------------|---------------|-------------|--------|-----------------|--------------|------------------------|-----------------------|
| Sample Name   | GP-NO2-Cl-1   | Position    | Vial 1 | Instrument Name | Instrument 1 | User Name              |                       |
| Inj Vol       | 0             | InjPosition |        | SampleType      | Sample       | IRM Calibration Status | Success               |
| Data Filename | GP-NO2-Cl-1.d | ACQ Method  |        | Comment         |              | Acquired Time          | 7/19/2016 11:08:15 AM |

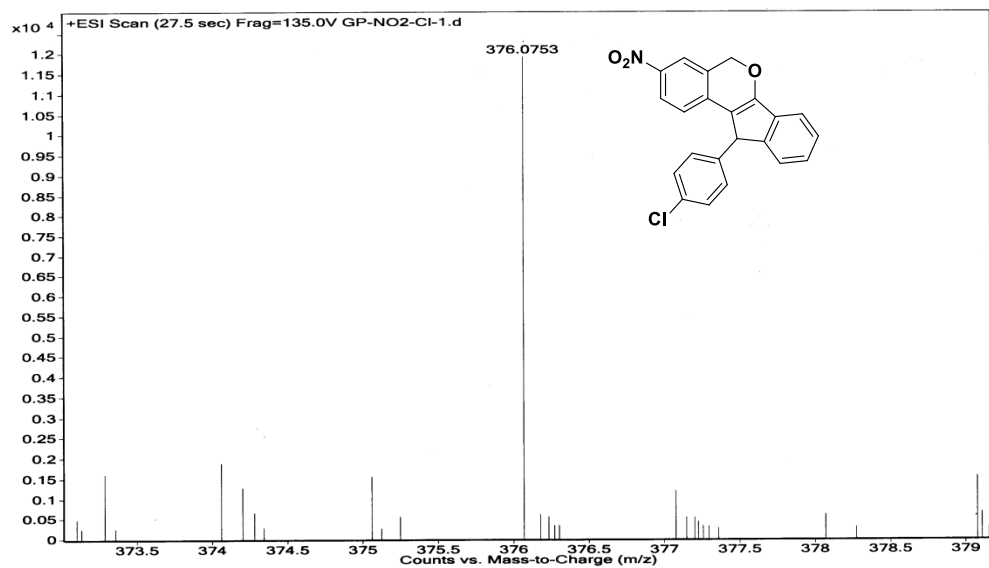

## HRMS spectrum of compound 3o

|               |            |             |        |                 |              |                        |                      |
|---------------|------------|-------------|--------|-----------------|--------------|------------------------|----------------------|
| Sample Name   | GP-OME-2   | Position    | Vial 1 | Instrument Name | Instrument 1 | User Name              |                      |
| Inj Vol       | 0          | InjPosition |        | SampleType      | Sample       | IRM Calibration Status | All Ions Missed      |
| Data Filename | GP-OME-2.d | ACQ Method  |        | Comment         |              | Acquired Time          | 7/18/2016 5:22:06 PM |

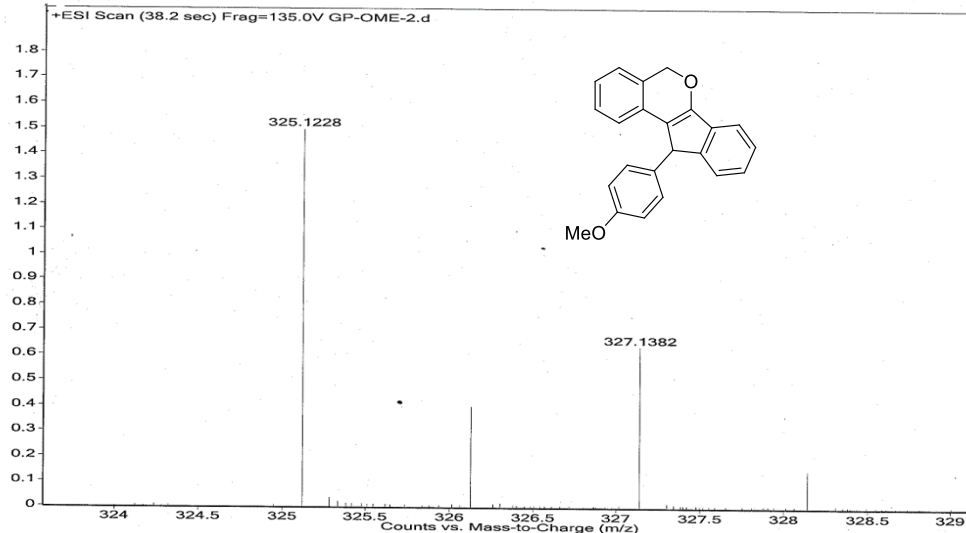

## HRMS spectrum of compound 3p

|               |             |             |        |                 |              |                        |                       |
|---------------|-------------|-------------|--------|-----------------|--------------|------------------------|-----------------------|
| Sample Name   | gp_mE_s_P   | Position    | Vial 1 | Instrument Name | Instrument 1 | User Name              |                       |
| Inj Vol       | 0           | InjPosition |        | SampleType      | Sample       | IRM Calibration Status | Success               |
| Data Filename | gp_mE_s_P.d | ACQ Method  |        | Comment         |              | Acquired Time          | 10/6/2016 11:17:07 AM |

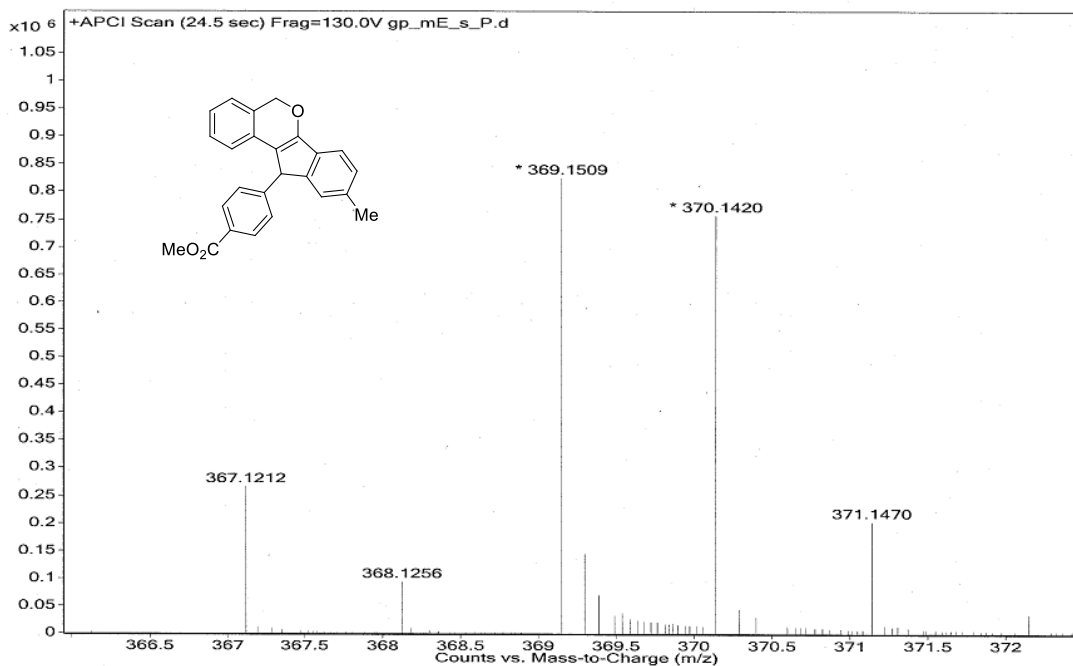

# HRMS spectrum of compound 3r

|               |             |             |        |                 |              |                        |                       |
|---------------|-------------|-------------|--------|-----------------|--------------|------------------------|-----------------------|
| Sample Name   | GP-ISOVAL   | Position    | Vial 1 | Instrument Name | Instrument 1 | User Name              |                       |
| Inj Vol       | 0           | InjPosition |        | SampleType      | Sample       | IRM Calibration Status | Some Ions Missed      |
| Data Filename | GP-ISOVAL.d | ACQ Method  |        | Comment         |              | Acquired Time          | 10/19/2016 3:07:14 PM |

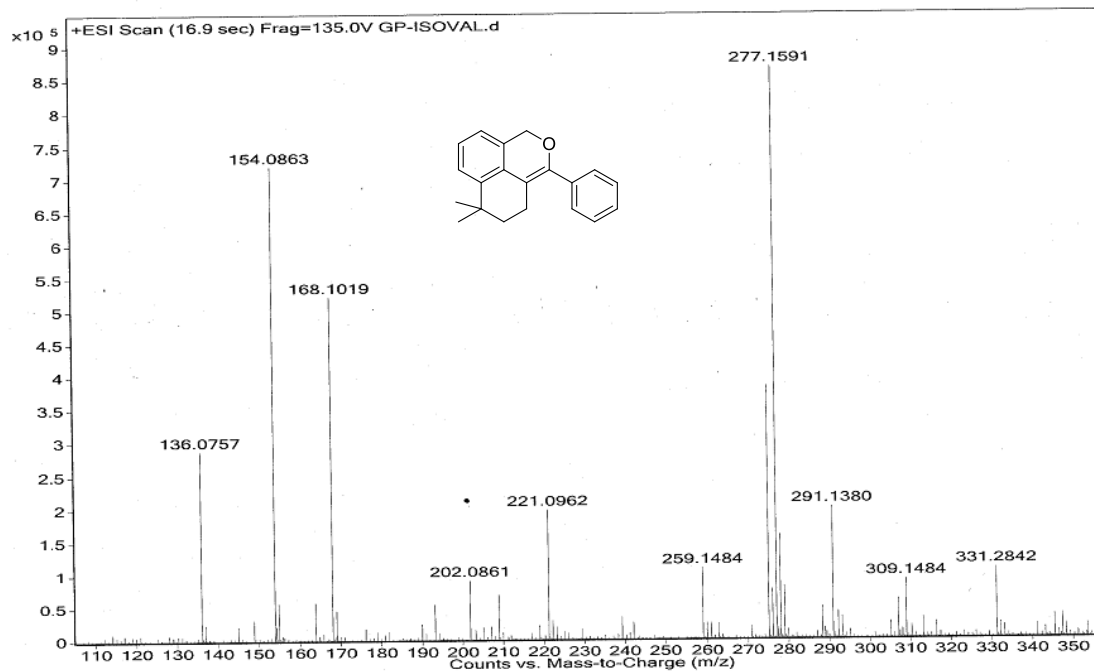

Supplement: c6ra22329j1.pdf [file c6ra22329j1.pdf]
